# Supplementary material for: Nitroxyl as a ligand in ruthenium tetraammine systems: a density functional theory study
Source: Royal Society of Chemistry journal article supplement (doi:10.1039/c5dt03706a), 2016-01-01

## Supporting Information

### *Nitroxyl as a ligand in rutheniumtetraammine systems. A density functional theory study.*

*Augusto C. H. Da Silva, Juarez L. F. Da Silva, Douglas W. Franco\*.*

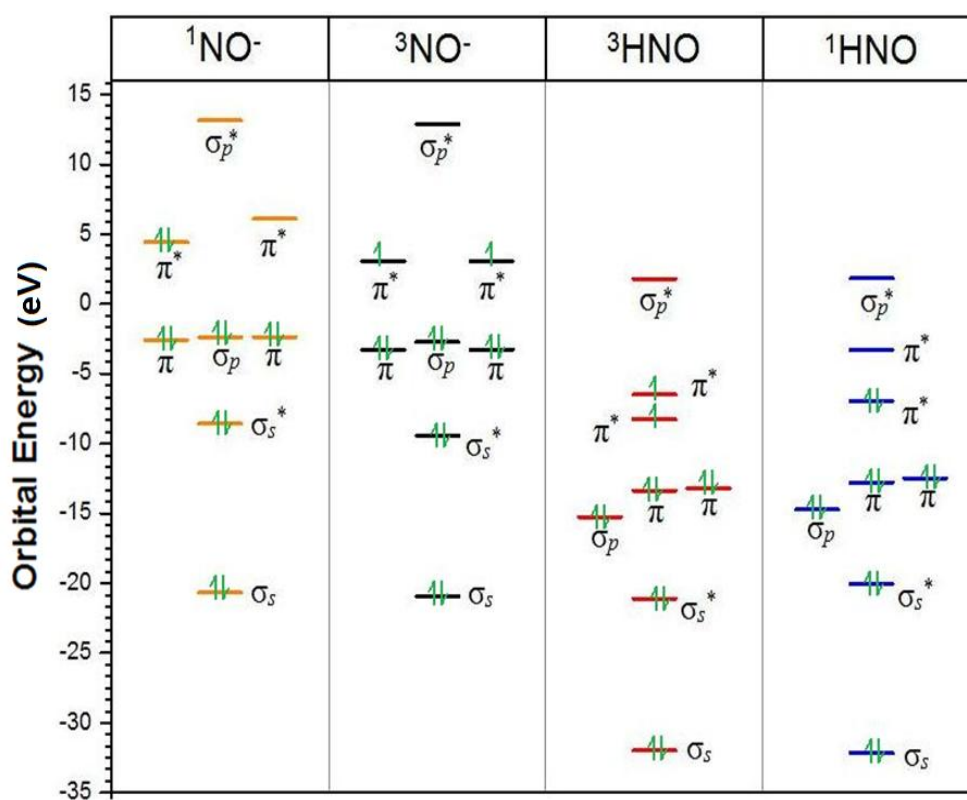

**Figure S1:** Nitroxyl species: B3LYP/DGDZVP valence molecular orbitals energies, occupancy and symmetry.

**Table S1:** Free Nitroxyl Species DFT calculated properties: Electronic Energies (E); N-O bond length (B.L.<sub>N-O</sub>); N-O bond stretching ( $\nu_{N-O}$ ); Mulliken Charges at nitrogen, oxygen and hydrogen ( $C_N$ ,  $C_O$ ,  $C_H$  respectively).

|                                                                                     |                   |                           |                               |                  |                       |
|-------------------------------------------------------------------------------------|-------------------|---------------------------|-------------------------------|------------------|-----------------------|
| <b>Spin= singlet</b>                                                                | <b>Charge= -1</b> | <b>ne<sup>-</sup>= 16</b> |                               | <b>Gas phase</b> | <b>IEFPCM (water)</b> |
| 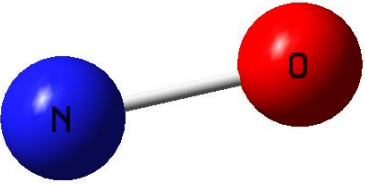   |                   |                           | <b>E (u.a.)</b>               | -129.85845053    | -129.98237140         |
|                                                                                     |                   |                           | <b>B.L.<sub>N-O</sub> (Å)</b> | 1.281            | 1.275                 |
|                                                                                     |                   |                           | $\nu_{N-O}$                   | 1435             | 1453                  |
|                                                                                     |                   |                           | <b>C<sub>N</sub></b>          | -0.528           | -0.540                |
|                                                                                     |                   |                           | <b>C<sub>O</sub></b>          | -0.472           | -0.460                |
| <b>Spin= triplet</b>                                                                | <b>Charge= -1</b> | <b>ne<sup>-</sup>= 16</b> |                               | <b>Gas phase</b> | <b>IEFPCM (water)</b> |
|    |                   |                           | <b>E (u.a.)</b>               | -129.91108410    | -130.03274590         |
|                                                                                     |                   |                           | <b>B.L.<sub>N-O</sub> (Å)</b> | 1.287            | 1.283                 |
|                                                                                     |                   |                           | $\nu_{N-O}$                   | 1420             | 1431                  |
|                                                                                     |                   |                           | <b>C<sub>N</sub></b>          | -0.484           | -0.486                |
|                                                                                     |                   |                           | <b>C<sub>O</sub></b>          | -0.516           | -0.514                |
| <b>Spin= triplet</b>                                                                | <b>Charge= 0</b>  | <b>ne<sup>-</sup>= 16</b> |                               | <b>Gas phase</b> | <b>IEFPCM (water)</b> |
|   |                   |                           | <b>E (u.a.)</b>               | -130.47795529    | -130.48269174         |
|                                                                                     |                   |                           | <b>B.L.<sub>N-O</sub> (Å)</b> | 1.238            | 1.239                 |
|                                                                                     |                   |                           | <b>B.L.<sub>H-N</sub> (Å)</b> | 1.033            | 1.034                 |
|                                                                                     |                   |                           | <b>Angle (°)</b>              | 118.45           | 119.21                |
|                                                                                     |                   |                           | $\nu_{N-O}$                   | 1583             | 1586                  |
|                                                                                     |                   |                           | <b>C<sub>N</sub></b>          | -0.228           | -0.238                |
|                                                                                     |                   |                           | <b>C<sub>O</sub></b>          | -0.136           | -0.166                |
|                                                                                     |                   |                           | <b>C<sub>H</sub></b>          | 0.365            | 0.404                 |
| <b>Spin= singlet</b>                                                                | <b>Charge= 0</b>  | <b>ne<sup>-</sup>= 16</b> |                               | <b>Gas phase</b> | <b>IEFPCM (water)</b> |
|  |                   |                           | <b>E (u.a.)</b>               | -130.49366383    | -130.49816660         |
|                                                                                     |                   |                           | <b>B.L.<sub>N-O</sub> (Å)</b> | 1.214            | 1.217                 |
|                                                                                     |                   |                           | <b>B.L.<sub>H-N</sub> (Å)</b> | 1.065            | 1.057                 |
|                                                                                     |                   |                           | <b>Angle (°)</b>              | 108.14           | 108.35                |
|                                                                                     |                   |                           | $\nu_{N-O}$                   | 1668             | 1661                  |
|                                                                                     |                   |                           | <b>C<sub>N</sub></b>          | -0.133           | -0.147                |
|                                                                                     |                   |                           | <b>C<sub>O</sub></b>          | -0.163           | -0.192                |
|                                                                                     |                   |                           | <b>C<sub>H</sub></b>          | 0.297            | 0.339                 |

**Table S2:** Energy difference between the singlet and triplet species of coordinated nitroxyl and HOMO-LUMO energy gap.

| Species                                                                                   | $s-t\Delta E_{el}$        | $s-t\Delta G$ | Singlet species      |
|-------------------------------------------------------------------------------------------|---------------------------|---------------|----------------------|
|                                                                                           | (kcal.mol <sup>-1</sup> ) |               | HOMO - LUMO gap (eV) |
| <i>trans</i> -[Ru(NH <sub>3</sub> ) <sub>5</sub> NO] <sup>1+</sup>                        | -9,3                      | -8,5          | 3.31                 |
| <i>trans</i> -[Ru(NH <sub>3</sub> ) <sub>4</sub> (py)NO] <sup>1+</sup>                    | -8,5                      | -7,4          | 3.03                 |
| <i>trans</i> -[Ru(NH <sub>3</sub> ) <sub>4</sub> (P(OEt) <sub>3</sub> )NO] <sup>1+</sup>  | -1,0                      | -1,3          | 3.0                  |
| <i>trans</i> -[Ru(NH <sub>3</sub> ) <sub>4</sub> (H <sub>2</sub> O)NO] <sup>1+</sup>      | -10,3                     | -9,5          | 3.48                 |
| <i>trans</i> -[Ru(NH <sub>3</sub> ) <sub>4</sub> (Cl)NO]                                  | -11,1                     | -10,5         | 3.41                 |
| <i>trans</i> -[Ru(NH <sub>3</sub> ) <sub>5</sub> HNO] <sup>2+</sup>                       | -32,1                     | -30,4         | 3.69                 |
| <i>trans</i> -[Ru(NH <sub>3</sub> ) <sub>4</sub> (py)HNO] <sup>2+</sup>                   | -29,0                     | -27,9         | 6.37                 |
| <i>trans</i> -[Ru(NH <sub>3</sub> ) <sub>4</sub> (P(OEt) <sub>3</sub> )HNO] <sup>2+</sup> | -35,8                     | -32,5         | 3.37                 |
| <i>trans</i> -[Ru(NH <sub>3</sub> ) <sub>4</sub> (H <sub>2</sub> O)HNO] <sup>2+</sup>     | -34,3                     | -32,8         | 3.82                 |
| <i>trans</i> -[Ru(NH <sub>3</sub> ) <sub>4</sub> (Cl)HNO] <sup>1+</sup>                   | -37,9                     | -35,4         | 3.56                 |

**Table S3:** B3LYP/DGDZVP selected Mulliken charges, H-N<sub>(HNO)</sub> distances and  $\nu_{H-N(HNO)}$  stretching. for the free nitroxyl molecule, nitroxyl complexes series and pentacoordinated systems <sup>1</sup>[Ru(NH<sub>3</sub>)<sub>4</sub>(L)]<sup>n+</sup>.

| Species                                                                                                 | Mulliken Charges |                      |                  |                  | D        | $\nu$    |
|---------------------------------------------------------------------------------------------------------|------------------|----------------------|------------------|------------------|----------|----------|
|                                                                                                         | Ru               | Ru <sub>(5cdt)</sub> | H <sub>HNO</sub> | N <sub>HNO</sub> | H-N(HNO) | H-N(HNO) |
| Free HNO                                                                                                | #                | #                    | 0.339            | -0.147           | 1.07     | 3007.6   |
| <sup>1</sup> [Ru(NH <sub>3</sub> ) <sub>5</sub> HNO] <sup>2+</sup>                                      | 1.063            | 1.013                | 0.391            | -0.241           | 1.04     | 3204.0   |
| <i>trans</i> - <sup>1</sup> [Ru(NH <sub>3</sub> ) <sub>4</sub> (py)HNO] <sup>2+</sup>                   | 1.039            | 1.24                 | 0.390            | -0.231           | 1.04     | 3199.4   |
| <i>trans</i> - <sup>1</sup> [Ru(NH <sub>3</sub> ) <sub>4</sub> (P(OEt) <sub>3</sub> )HNO] <sup>2+</sup> | 0.640            | 0.538                | 0.394            | -0.237           | 1.04     | 3189.6   |
| <i>trans</i> - <sup>1</sup> [Ru(NH <sub>3</sub> ) <sub>4</sub> (Cl)HNO] <sup>1+</sup>                   | 0.841            | 0.834                | 0.382            | -0.240           | 1.04     | 3206.8   |
| <i>trans</i> - <sup>1</sup> [Ru(NH <sub>3</sub> ) <sub>4</sub> (Br)HNO] <sup>1+</sup>                   | 0.865            | 0.871                | 0.384            | -0.237           | 1.04     | 3196.3   |
| <i>trans</i> - <sup>1</sup> [Ru(NH <sub>3</sub> ) <sub>4</sub> (H <sub>2</sub> O)HNO] <sup>2+</sup>     | 1.051            | 1.033                | 0.398            | -0.229           | 1.04     | 3216.8   |

**Table S4:** NBO 3.0 and NBO 6.0 orbital energies data for Ru-N(H)O bond.

| Species                                                                               | NBO 3.0                             | NBO 6.0<br>(a.u.)                   |
|---------------------------------------------------------------------------------------|-------------------------------------|-------------------------------------|
| $^1[\text{Ru}(\text{NH}_3)_5\text{HNO}]^{2+}$                                         | $\sigma$ -0.65611                   | $\sigma$ -0.64826                   |
| $^{\text{trans-}}^1[\text{Ru}(\text{NH}_3)_4(\text{py})\text{HNO}]^{2+}$              | $\sigma$ -0.67531<br>$\pi$ -0.33628 | $\sigma$ -0.66753<br>$\pi$ -0.32362 |
| $^{\text{trans-}}^1[\text{Ru}(\text{NH}_3)_4(\text{P}(\text{OEt})_3)\text{HNO}]^{2+}$ | $\sigma$ -0.66005                   | $\sigma$ -0.64364                   |
| $^{\text{trans-}}^1[\text{Ru}(\text{NH}_3)_4(\text{Cl})\text{HNO}]^{1+}$              | $\sigma$ -0.65586                   | $\sigma$ -0.64299                   |
| $^{\text{trans-}}^1[\text{Ru}(\text{NH}_3)_4(\text{Br})\text{HNO}]^{1+}$              | $\sigma$ -0.65800                   | $\sigma$ -0.64418                   |
| $^{\text{trans-}}^1[\text{Ru}(\text{NH}_3)_4(\text{H}_2\text{O})\text{HNO}]^{2+}$     | $\sigma$ -0.67219                   | $\sigma$ -0.65661                   |

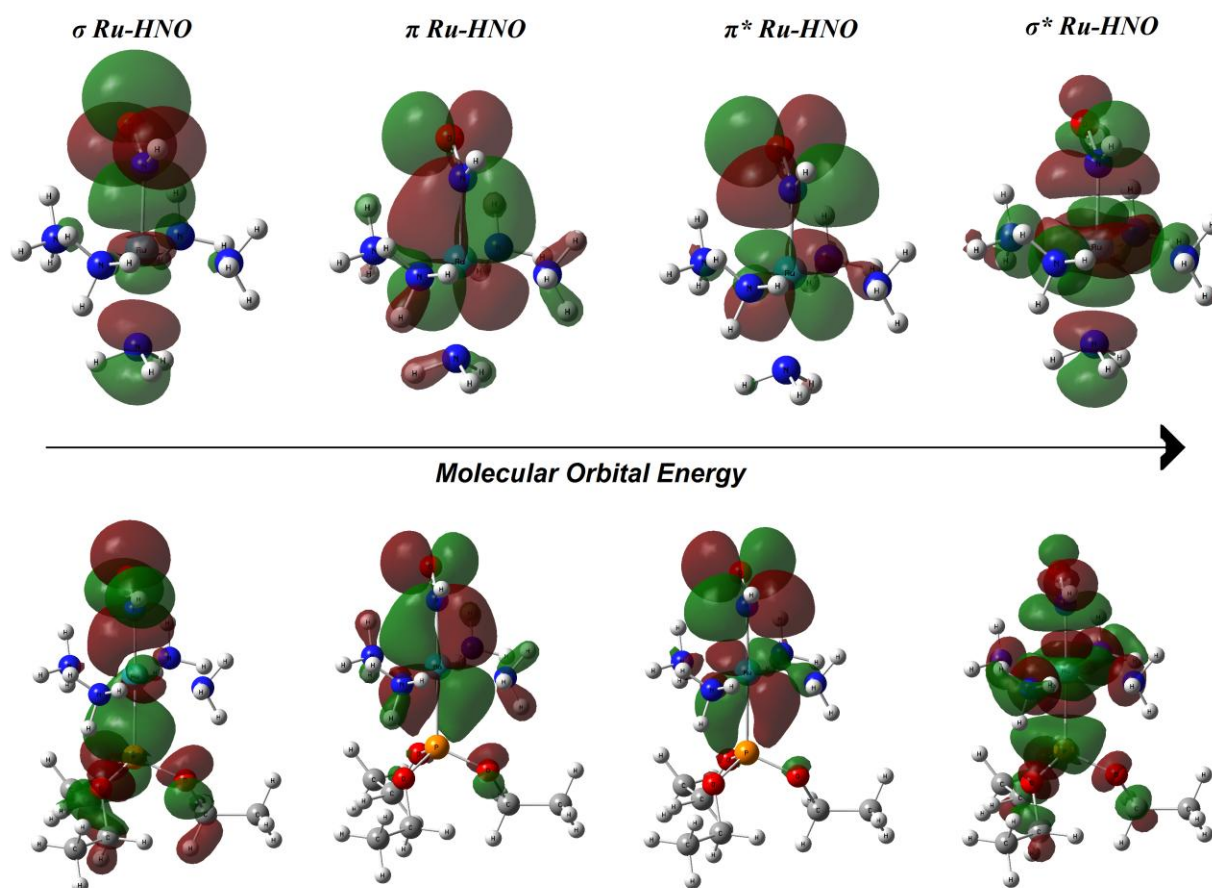

**Figure S2:** Ru-HNO  $\sigma$  and  $\pi$  bonding and anti bonding molecular orbitals isosurfaces for the  $^1[\text{Ru}(\text{NH}_3)_5\text{HNO}]^{2+}$  (above) and  $^{\text{trans-}}^1[\text{Ru}(\text{NH}_3)_4(\text{P}(\text{OEt})_3)\text{HNO}]^{2+}$  (below).

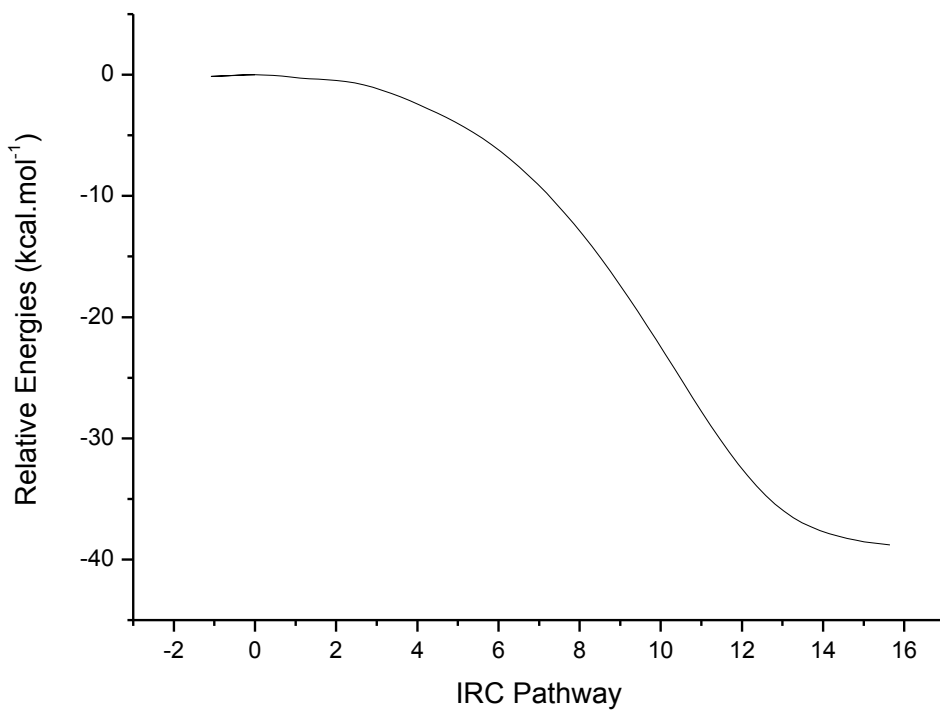

Figure S3: IRC pathway to the HNO cleavage in  $^1[\text{Ru}(\text{NH}_3)_5\text{HNO}]^{2+}$  system.

### Geometry Index:

*Free HNO structures: B3LYP/DGDZVP*

$^1\text{HNO}$

|     |             |             |            |
|-----|-------------|-------------|------------|
| 0 1 |             |             |            |
| N   | 0.06271200  | 0.58785100  | 0.00000000 |
| O   | 0.06271200  | -0.62944600 | 0.00000000 |
| H   | -0.94068000 | 0.92060900  | 0.00000000 |

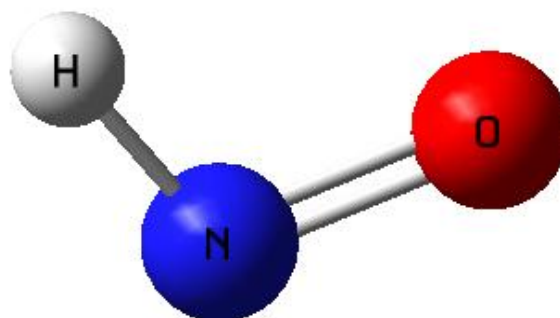

2 Lower vibrational modes in  $1572.1181 \text{ cm}^{-1}$  and  $1667.8745 \text{ cm}^{-1}$ .

### $^3\text{HNO}$

|     |             |             |            |
|-----|-------------|-------------|------------|
| 0 3 |             |             |            |
| N   | 0.05642500  | 0.58799600  | 0.00000000 |
| O   | 0.05642500  | -0.65110200 | 0.00000000 |
| H   | -0.84637600 | 1.09284300  | 0.00000000 |

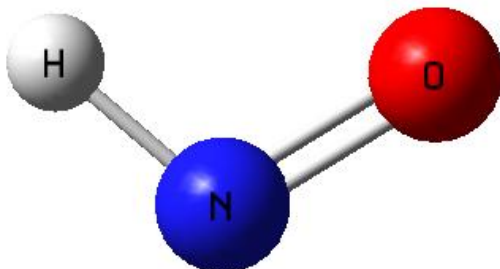

2 Lower vibrational modes in  $1068.4783\text{ cm}^{-1}$  and  $1583.4498\text{ cm}^{-1}$ .

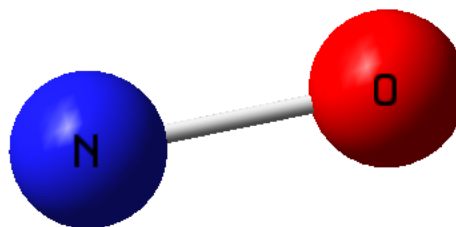

Lower vibrational mode in  $1420.4476\text{ cm}^{-1}$ .

### $^1\text{NO}$

|      |            |            |             |
|------|------------|------------|-------------|
| -1 1 |            |            |             |
| N    | 0.00000000 | 0.00000000 | -0.68314900 |
| O    | 0.00000000 | 0.00000000 | 0.59775500  |

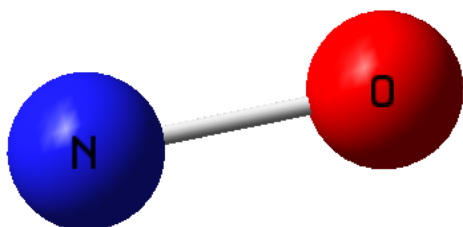

Lower vibrational mode in  $1435.2792\text{ cm}^{-1}$ .

### $^3\text{NO}$

|      |            |            |             |
|------|------------|------------|-------------|
| -1 3 |            |            |             |
| N    | 0.00000000 | 0.00000000 | -0.68637000 |
| O    | 0.00000000 | 0.00000000 | 0.60057300  |

**HNO BDE structures and Enthalpies: B3LYP/DGDZVP**  
**SCRF(IEFPCM,SOLVENT=WATER)**

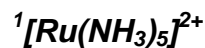

|     |             |             |             |
|-----|-------------|-------------|-------------|
| 2 1 |             |             |             |
| Ru  | 0.00046900  | -0.00006600 | -0.21535300 |
| N   | -1.39466300 | 1.69253100  | -0.25938200 |
| N   | -1.69066700 | -1.39577300 | -0.27660500 |
| N   | 1.41207700  | -1.67879000 | -0.26358300 |
| N   | 1.69007500  | 1.40240400  | -0.24652800 |
| H   | -1.14612000 | 2.46389600  | 0.36430500  |
| H   | -1.43955500 | 2.10403000  | -1.19478200 |
| H   | -2.36057400 | 1.45548900  | -0.02149200 |
| H   | -1.96628700 | -1.59748300 | -1.24082000 |
| H   | -1.50975400 | -2.30719300 | 0.15055800  |
| H   | -2.53792000 | -1.05263100 | 0.18177700  |
| H   | 1.00533100  | -2.58612500 | -0.02578700 |
| H   | 1.80742400  | -1.79681900 | -1.19954600 |
| H   | 2.21556100  | -1.57323600 | 0.35998200  |
| H   | 1.96357600  | 1.61556200  | -1.20879200 |
| H   | 1.50229300  | 2.30866500  | 0.18865500  |
| H   | 2.54039200  | 1.05800900  | 0.20555200  |
| N   | -0.01988100 | -0.02187200 | 1.90406800  |
| H   | 0.09946200  | -0.95959700 | 2.29516600  |
| H   | 0.72180600  | 0.54806300  | 2.31783300  |
| H   | -0.89485900 | 0.33274700  | 2.29713100  |

2 Lower vibrational modes in 18.3926  $cm^{-1}$  and 55.1075  $cm^{-1}$ .  
 Enthalpy = - 4725.272989 Hartree

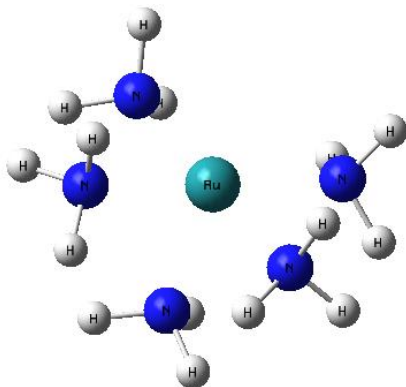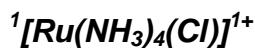

|     |             |             |             |
|-----|-------------|-------------|-------------|
| 1 1 |             |             |             |
| Ru  | 0.00244900  | 0.00662100  | -0.42179000 |
| N   | 1.38217500  | 1.70534500  | -0.36547600 |
| N   | -1.69939200 | 1.38531600  | -0.38751900 |
| N   | -1.37622400 | -1.69482200 | -0.42249300 |
| N   | 1.70509600  | -1.37035100 | -0.40482000 |
| H   | 1.35908000  | 2.13914100  | 0.56036100  |
| H   | 2.35926900  | 1.45567700  | -0.52739600 |
| H   | 1.17680200  | 2.45185000  | -1.03287000 |
| H   | -1.44371400 | 2.36163900  | -0.54148700 |
| H   | -2.43236600 | 1.18591400  | -1.07239300 |
| H   | -2.14684400 | 1.35985400  | 0.53152200  |
| H   | -2.34991800 | -1.43219700 | -0.58494900 |
| H   | -1.16849300 | -2.42022900 | -1.11253100 |
| H   | -1.36957600 | -2.15478700 | 0.48946200  |
| H   | 2.44403500  | -1.15435900 | -1.07698200 |
| H   | 2.15012100  | -1.36121300 | 0.51483400  |
| H   | 1.45413000  | -2.34463500 | -0.58596800 |
| Cl  | -0.01305000 | -0.03272900 | 2.00348900  |

2 Lower vibrational modes in 50.1486  $cm^{-1}$  and 63.4725  $cm^{-1}$ .  
 Enthalpy = -5129.082081 Hartree

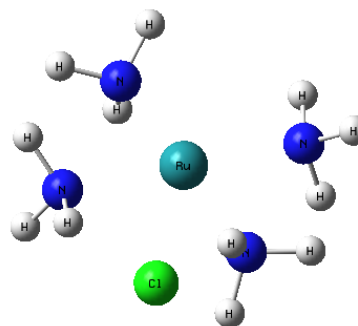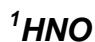

|     |             |             |            |
|-----|-------------|-------------|------------|
| 0 1 |             |             |            |
| N   | 0.06271200  | 0.58788200  | 0.00000000 |
| O   | 0.06271200  | -0.62944100 | 0.00000000 |
| H   | -0.94068600 | 0.92035400  | 0.00000000 |

2 Lower vibrational modes in 1570.6298  $cm^{-1}$  and 1660.6932  $cm^{-1}$ .  
 Enthalpy = -130.480169 Hartree

$^1[Ru(NH_3)_4(py)]^{2+}$ 

|     |             |             |             |
|-----|-------------|-------------|-------------|
| 2 1 |             |             |             |
| Ru  | 1.13587300  | 0.00007600  | 0.00025700  |
| N   | 1.19393500  | 1.43175300  | -1.66081400 |
| N   | 1.22041900  | -1.60326900 | -1.49734900 |
| N   | 1.19231200  | -1.43170500 | 1.66139300  |
| N   | 1.21752400  | 1.60362200  | 1.49800000  |
| H   | 0.35629500  | 1.41822800  | -2.24759500 |
| H   | 1.32341300  | 2.40910400  | -1.38902700 |
| H   | 1.97219000  | 1.23139200  | -2.29372700 |
| H   | 2.09573500  | -1.55291400 | -2.02494900 |
| H   | 1.18963400  | -2.55878500 | -1.13338200 |
| H   | 0.47815200  | -1.55397300 | -2.19909700 |
| H   | 1.32353300  | -2.40880900 | 1.38955200  |
| H   | 1.96899300  | -1.23059400 | 2.29599200  |
| H   | 0.35343300  | -1.41936200 | 2.24642000  |
| H   | 2.09227300  | 1.55393600  | 2.02659900  |
| H   | 1.18647300  | 2.55906900  | 1.13388700  |
| H   | 0.47448200  | 1.55379500  | 2.19888200  |
| N   | -0.92259400 | -0.00013900 | -0.00064400 |
| C   | -1.62641800 | 1.15890300  | -0.01315700 |
| C   | -3.01772000 | 1.19771800  | -0.01290000 |
| C   | -3.73576400 | -0.00020300 | -0.00036800 |
| C   | -3.01765300 | -1.19808700 | 0.01188500  |
| C   | -1.62634200 | -1.15922600 | 0.01182900  |
| H   | -1.05169900 | 2.07683500  | -0.02237600 |
| H   | -3.51798400 | 2.16069100  | -0.02201200 |
| H   | -4.82167600 | -0.00022400 | -0.00017200 |
| H   | -3.51788800 | -2.16107300 | 0.02107100  |
| H   | -1.05157200 | -2.07713700 | 0.02080400  |

2 Lower vibrational modes in 54.1621  $cm^{-1}$  and 74.4804  $cm^{-1}$ .

Enthalpy = -4916.959784 Hartree

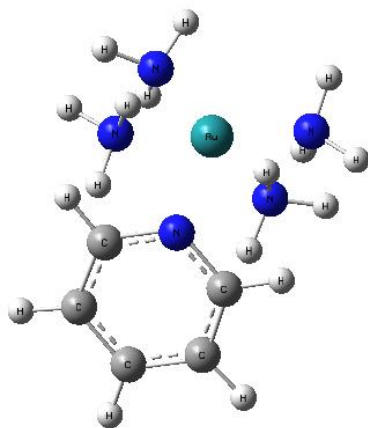 $^1[Ru(NH_3)_4(H_2O)]^{2+}$ 

|     |             |             |             |
|-----|-------------|-------------|-------------|
| 2 1 |             |             |             |
| Ru  | -0.00275800 | 0.00813600  | -0.22781600 |
| N   | 1.02889500  | -1.91280400 | -0.23701900 |
| N   | 1.93418600  | 1.02533600  | -0.29009200 |
| N   | -1.04810600 | 1.93454600  | -0.17834600 |
| N   | -1.93567300 | -1.02003100 | -0.28984900 |
| H   | 1.28134800  | -2.18584800 | 0.71591400  |
| H   | 0.47500500  | -2.68586300 | -0.61217800 |
| H   | 1.90006700  | -1.91981200 | -0.77209700 |
| H   | 2.21525300  | 1.20643800  | -1.25685700 |
| H   | 1.96064100  | 1.93517200  | 0.17581800  |
| H   | 2.70061700  | 0.48922600  | 0.12318800  |
| H   | -0.43563800 | 2.74439700  | -0.29871300 |
| H   | -1.74632200 | 2.01296900  | -0.92163600 |
| H   | -1.55522500 | 2.10435100  | 0.69342700  |
| H   | -2.17503300 | -1.27214200 | -1.25188000 |
| H   | -1.97585000 | -1.89473600 | 0.23861000  |
| H   | -2.72230000 | -0.46198400 | 0.04983700  |
| H   | -0.78776400 | -0.23268000 | 2.35647400  |
| O   | 0.07886100  | -0.12726600 | 1.92303100  |
| H   | 0.50056200  | 0.63135400  | 2.36687800  |

2 Lower vibrational modes in 88.7813  $cm^{-1}$  and 109.1886  $cm^{-1}$ .

Enthalpy = -4745.134659 Hartree

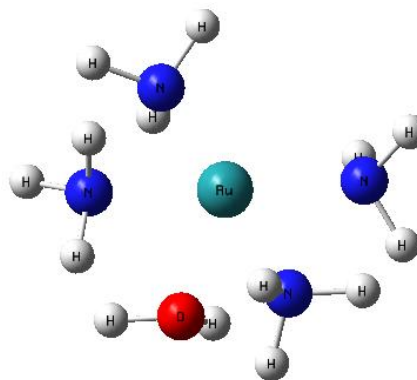



$^1[Ru(NH_3)_4(Br)]^{1+}$ 

|     |             |             |             |
|-----|-------------|-------------|-------------|
| 1 1 |             |             |             |
| Ru  | 0.74965500  | 0.00098200  | 0.00072200  |
| N   | 0.75486800  | -1.66350600 | 1.42600200  |
| N   | 0.74777200  | 1.42741100  | 1.66404800  |
| N   | 0.75227100  | 1.66530700  | -1.42474200 |
| N   | 0.75830100  | -1.42513800 | -1.66264500 |
| H   | 0.81498700  | -2.58409000 | 0.98588400  |
| H   | 1.52365000  | -1.63083800 | 2.09927800  |
| H   | -0.10660200 | -1.67959400 | 1.97652400  |
| H   | 1.52051200  | 2.09663000  | 1.63996200  |
| H   | -0.11072800 | 1.98263100  | 1.66975400  |
| H   | 0.79504700  | 0.98747700  | 2.58537800  |
| H   | 1.51600500  | 1.62960800  | -2.10368000 |
| H   | -0.11311700 | 1.68464200  | -1.96889700 |
| H   | 0.81954700  | 2.58573900  | -0.98522900 |
| H   | 1.53998800  | -2.08387700 | -1.64047200 |
| H   | -0.09256400 | -1.99207600 | -1.66559600 |
| H   | 0.79608400  | -0.98488600 | -2.58412300 |
| Br  | -1.79943200 | -0.00237400 | -0.00169100 |

2 Lower vibrational modes in 64.2993  $cm^{-1}$  and 85.9101  $cm^{-1}$ .

Enthalpy = -7242.612377 Hartree

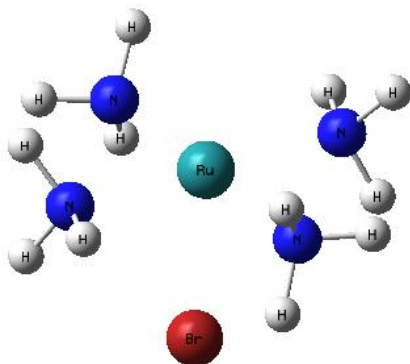 $^1[Ru(NH_3)_4(P(OEt)_3)]^{2+}$ 

|     |             |             |             |
|-----|-------------|-------------|-------------|
| 2 1 |             |             |             |
| Ru  | -1.74581900 | 0.00368900  | 0.03424300  |
| N   | -1.85580300 | 0.01754600  | -2.14835800 |
| N   | -1.89504900 | 2.18509700  | 0.08111900  |
| N   | -1.81056700 | -0.06280700 | 2.21793200  |
| N   | -1.80386300 | -2.18338000 | -0.01813900 |
| H   | -2.74858100 | -0.36435800 | -2.47146900 |
| H   | -1.77992500 | 0.94219200  | -2.57788500 |
| H   | -1.12623800 | -0.54537000 | -2.59195200 |
| H   | -0.98217200 | 2.64326800  | 0.13578100  |
| H   | -2.43621100 | 2.53141200  | 0.87674600  |
| H   | -2.35579000 | 2.57332800  | -0.74507600 |
| H   | -1.67216900 | 0.84029500  | 2.67664900  |
| H   | -2.71610700 | -0.40604500 | 2.54852200  |
| H   | -1.10522500 | -0.68153800 | 2.62370100  |
| H   | -1.35346300 | -2.64907800 | 0.77238700  |
| H   | -2.77687600 | -2.50071600 | -0.00749100 |
| H   | -1.38687800 | -2.60166600 | -0.85248100 |
| P   | 0.44929000  | 0.02770500  | 0.00621400  |
| O   | 1.09864700  | -0.78710700 | 1.25246000  |
| O   | 1.05726600  | -0.64815300 | -1.33970800 |
| O   | 1.09345500  | 1.51831400  | 0.07240400  |
| C   | 2.35515700  | -0.46329600 | 1.93726500  |
| C   | 2.39278600  | -1.24110000 | 3.23939800  |
| H   | 3.18910700  | -0.74409100 | 1.28800500  |
| H   | 2.38429300  | 0.61438300  | 2.11425900  |
| H   | 3.32974600  | -1.02093300 | 3.76138900  |
| H   | 1.56069700  | -0.95573900 | 3.88959600  |
| H   | 2.34625000  | -2.31824400 | 3.05471700  |
| C   | 2.22038700  | -1.53487700 | -1.43681800 |
| C   | 2.09732500  | -2.32900200 | -2.72379900 |
| H   | 2.23373200  | -2.19115300 | -0.56366800 |
| H   | 3.12324300  | -0.91756700 | -1.43685300 |
| H   | 2.06762500  | -1.66532800 | -3.59284900 |
| H   | 1.19320200  | -2.94487800 | -2.71629100 |
| H   | 2.96554800  | -2.98857500 | -2.82310900 |
| C   | 2.27500400  | 1.98885000  | -0.65931100 |
| C   | 2.24677700  | 3.50578300  | -0.67365900 |
| H   | 2.24254300  | 1.57797200  | -1.67090200 |
| H   | 3.16748500  | 1.61626200  | -0.14886800 |
| H   | 3.13314400  | 3.87444700  | -1.20019300 |
| H   | 1.35873900  | 3.87735800  | -1.19340900 |
| H   | 2.25837300  | 3.90868800  | 0.34324600  |

2 Lower vibrational modes in 15.0904  $cm^{-1}$  and 26.5363  $cm^{-1}$ .

Enthalpy = -5473.323943 Hartree

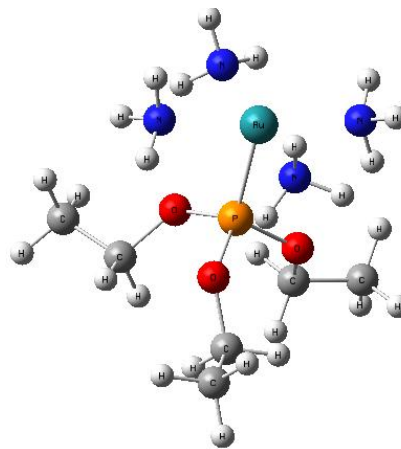

**HNO Simplest cleavage structures and Free Energies: B3LYP/DGDZVP  
SCRF(IEFPCM,SOLVENT=WATER)**

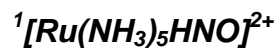

**RC**

|     |             |             |             |
|-----|-------------|-------------|-------------|
| 2 1 |             |             |             |
| Ru  | -0.13483500 | 0.00329200  | -0.00685300 |
| N   | 0.64601400  | 1.00930300  | 1.75886400  |
| H   | 0.43275000  | 0.53922200  | 2.64152200  |
| H   | 1.66798600  | 1.05626000  | 1.70795700  |
| N   | -0.93909300 | 1.89126400  | -0.78131100 |
| H   | -0.30243700 | 2.68194900  | -0.65635300 |
| H   | -1.15624200 | 1.87859100  | -1.78055100 |
| N   | -0.96012500 | -1.06319000 | -1.73575700 |
| H   | -0.26109200 | -1.60245600 | -2.25169800 |
| H   | -1.67990000 | -1.73905700 | -1.46957500 |
| N   | 0.64806700  | -1.85735400 | 0.80609700  |
| H   | 1.66935000  | -1.86116000 | 0.72689500  |
| H   | 0.44532700  | -2.00921200 | 1.79649300  |
| N   | -2.09842600 | -0.33445600 | 1.03069600  |
| H   | -2.21479500 | 0.25178300  | 1.86044300  |
| H   | -2.92158100 | -0.14922600 | 0.45271800  |
| H   | 0.32555000  | 1.97309200  | 1.87964300  |
| H   | -1.80865600 | 2.16857300  | -0.31947900 |
| H   | -2.21230300 | -1.29426700 | 1.36496500  |
| H   | -1.40368300 | -0.45906400 | -2.43126300 |
| H   | 0.32599600  | -2.70142000 | 0.32625000  |
| N   | 1.55073800  | 0.29047300  | -0.87062200 |
| O   | 2.68683700  | 0.11671300  | -0.39350100 |
| H   | 1.60155400  | 0.63555400  | -1.85419700 |

2 Lower vibrational modes in 15.3242  $cm^{-1}$  and 82.8734  $cm^{-1}$ .  
Free Energy = - 4855.874174 Hartree

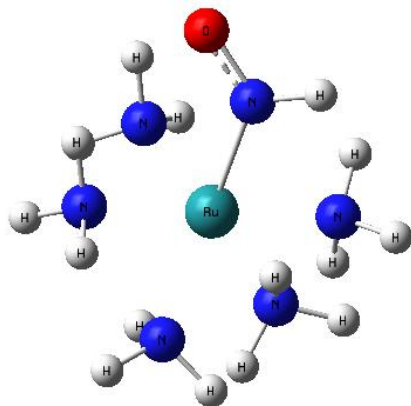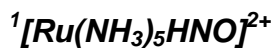

**TS**

|     |             |             |             |
|-----|-------------|-------------|-------------|
| 2 1 |             |             |             |
| Ru  | -0.38089000 | -0.00006800 | 0.03661100  |
| N   | 0.89432800  | -0.50578400 | -1.67241300 |
| H   | 0.83167000  | 0.15503200  | -2.45018800 |
| H   | 1.88170400  | -0.51283500 | -1.39545900 |
| N   | -0.52997500 | -2.11865900 | 0.57973900  |
| H   | -0.02372800 | -2.31220200 | 1.44725300  |
| H   | -1.48243400 | -2.45418500 | 0.74153400  |
| N   | -1.59709800 | 0.52551000  | 1.79267700  |
| H   | -1.06607700 | 1.08481000  | 2.46442100  |
| H   | -2.43106600 | 1.07705800  | 1.57865400  |
| N   | -0.16308200 | 2.13667800  | -0.43151700 |
| H   | 0.73870300  | 2.48695600  | -0.10009900 |
| H   | -0.19596800 | 2.37236600  | -1.42610100 |
| N   | -2.12020100 | -0.13485200 | -1.16677000 |
| H   | -1.94760100 | -0.59395100 | -2.06435600 |
| H   | -2.87680900 | -0.66372200 | -0.72609100 |
| H   | 0.71708300  | -1.42348800 | -2.08822900 |
| H   | -0.13406300 | -2.75929200 | -0.11148000 |
| H   | -2.51930000 | 0.77919100  | -1.39416100 |
| H   | -1.93552300 | -0.28180400 | 2.32058300  |
| H   | -0.86547900 | 2.73354100  | 0.01135700  |
| N   | 2.91790900  | 0.21988500  | 0.91985500  |
| O   | 3.58597900  | -0.12579600 | -0.03561200 |
| H   | 3.56703200  | 0.46243900  | 1.71536300  |

2 Lower vibrational modes in 30.1022  $cm^{-1}$  and 56.8537  $cm^{-1}$ .  
1 Imaginary frequency in -109.8251  $cm^{-1}$ .  
Free Energy = -4855.817443 Hartree

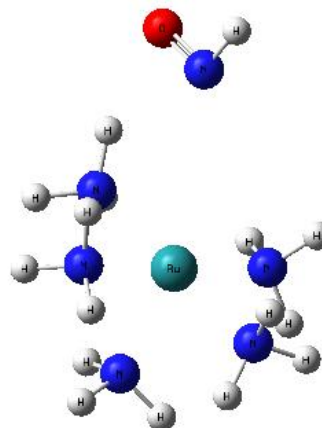

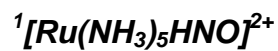

PC

2 1

|    |             |             |             |
|----|-------------|-------------|-------------|
| Ru | -0.41419200 | 0.00140400  | -0.05454400 |
| N  | 0.70229500  | -1.43275500 | 1.17158800  |
| H  | 0.38032600  | -2.40144200 | 1.11396700  |
| H  | 1.68085500  | -1.44336200 | 0.86632000  |
| N  | 0.54417900  | 1.62361800  | 1.06376200  |
| H  | 1.52212200  | 1.67465000  | 0.75850400  |
| H  | 0.15098400  | 2.55500000  | 0.91157000  |
| N  | -1.44805500 | 1.46744100  | -1.32257200 |
| H  | -0.82113500 | 1.84485600  | -2.03721400 |
| H  | -2.25032500 | 1.09591900  | -1.83593800 |
| N  | -1.25186600 | -1.63666200 | -1.25683300 |
| H  | -0.71804800 | -1.76804200 | -2.11946500 |
| H  | -1.24438200 | -2.54675500 | -0.79089600 |
| N  | -2.05753600 | -0.05056600 | 1.28122100  |
| H  | -2.11491300 | -0.92589300 | 1.80705200  |
| H  | -2.02311700 | 0.69513100  | 1.98065900  |
| H  | 0.72363900  | -1.21437500 | 2.17014500  |
| H  | 0.57462300  | 1.50295500  | 2.07868000  |
| H  | -2.96042800 | 0.05142200  | 0.81166700  |
| H  | -1.80639000 | 2.28099100  | -0.81732000 |
| H  | -2.22015400 | -1.49939500 | -1.55539600 |
| N  | 3.27919900  | 0.59853200  | -0.45960100 |
| O  | 3.36973900  | -0.61313500 | -0.39490200 |
| H  | 4.01538300  | 0.95440200  | -1.12616000 |

2 Lower vibrational modes in  $28.2543\text{ cm}^{-1}$  and  $52.9974\text{ cm}^{-1}$ .

Free Energy = -4855.818936 Hartree

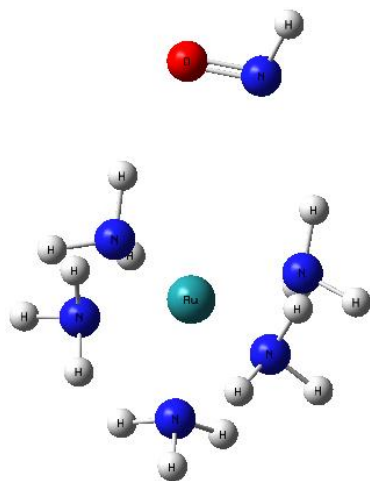

*trans*-<sup>1</sup>[Ru(NH<sub>3</sub>)<sub>4</sub>(py)HNO]<sup>2+</sup>

**RC**

2 1

|    |             |             |             |
|----|-------------|-------------|-------------|
| Ru | -0.81645400 | 0.01061700  | 0.11185700  |
| N  | -0.91254500 | 1.41414500  | -1.54572100 |
| H  | -0.15015000 | 1.31356000  | -2.22000900 |
| H  | -1.77799800 | 1.25999400  | -2.07201400 |
| N  | -0.68231300 | 1.58786400  | 1.63167000  |
| H  | -1.34954900 | 1.48371200  | 2.39973800  |
| H  | 0.23682900  | 1.59929300  | 2.08038200  |
| N  | -0.68920900 | -1.42489200 | 1.76528300  |
| H  | -1.26982000 | -1.18347600 | 2.57185200  |
| H  | -0.96904300 | -2.37704100 | 1.51800900  |
| N  | -0.92633000 | -1.55200300 | -1.39814400 |
| H  | -1.84512900 | -1.51436100 | -1.85082900 |
| H  | -0.23846600 | -1.45361200 | -2.14841900 |
| H  | -0.92847700 | 2.40410200  | -1.28986100 |
| H  | -0.83277800 | 2.53838300  | 1.28465700  |
| H  | 0.26048200  | -1.50095800 | 2.13756300  |
| H  | -0.83101900 | -2.51287200 | -1.06034500 |
| N  | -2.74108100 | 0.02249500  | 0.15036400  |
| O  | -3.50434600 | -0.06940200 | -0.82532500 |
| C  | 3.50218000  | 1.18222300  | -0.19921000 |
| C  | 4.20677700  | -0.02341400 | -0.21587200 |
| C  | 2.09601300  | -1.15835200 | -0.03423100 |
| H  | 4.01041800  | 2.13880700  | -0.26368900 |
| H  | 5.29008800  | -0.03372300 | -0.29316500 |
| H  | 1.51763700  | -2.07427900 | 0.02535500  |
| N  | 1.40498100  | 0.00358200  | -0.01247700 |
| C  | 2.11311400  | 1.15220200  | -0.09785600 |
| H  | 1.55068300  | 2.07994900  | -0.08864200 |
| C  | 3.48422500  | -1.21566000 | -0.13280000 |
| H  | 3.97774400  | -2.18200000 | -0.14450500 |
| H  | -3.28106400 | 0.12224800  | 1.03781600  |

2 Lower vibrational modes in 58.6556 cm<sup>-1</sup> and 65.3751 cm<sup>-1</sup>.

Free Energy = -5047.560643 Hartree

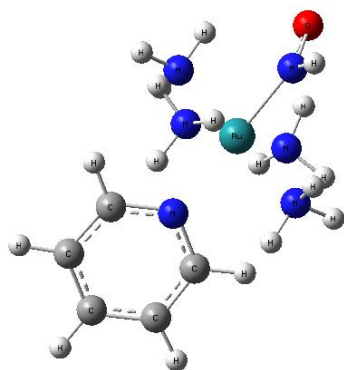

*trans*-<sup>1</sup>[Ru(NH<sub>3</sub>)<sub>4</sub>(py)HNO]<sup>2+</sup>

**TS**

2 1

|    |             |             |             |
|----|-------------|-------------|-------------|
| Ru | -0.58310200 | 0.25098600  | 0.15947300  |
| N  | -0.66038600 | 1.34410400  | -1.73978200 |
| N  | -0.20441700 | 2.08470900  | 1.30807600  |
| N  | -0.68465500 | -0.81895800 | 2.07416000  |
| N  | -1.10601700 | -1.54862300 | -0.97084200 |
| H  | 0.02763400  | 1.03598700  | -2.43127600 |
| H  | -1.57079600 | 1.21397700  | -2.18783800 |
| H  | -0.54439700 | 2.35793300  | -1.67116000 |
| H  | -0.89788300 | 2.20146100  | 2.05078100  |
| H  | 0.70193100  | 2.09388600  | 1.78186500  |
| H  | -0.24512500 | 2.95508700  | 0.77243400  |
| H  | 0.15866500  | -0.73668900 | 2.64729900  |
| H  | -1.44148200 | -0.44109500 | 2.64954700  |
| H  | -0.87911900 | -1.82120600 | 2.01370100  |
| H  | -0.95325100 | -2.44214400 | -0.49778600 |
| H  | -2.10592200 | -1.53884300 | -1.20074400 |
| H  | -0.61291100 | -1.63049400 | -1.86292900 |
| N  | 1.43871000  | -0.08915000 | -0.04203300 |
| C  | 2.27980600  | 0.90146600  | -0.43020200 |
| C  | 3.65129600  | 0.71430900  | -0.57671700 |
| C  | 4.20180500  | -0.54236300 | -0.31576000 |
| C  | 3.34165200  | -1.56724500 | 0.08545800  |
| C  | 1.98019600  | -1.30585600 | 0.21036000  |
| H  | 1.83553100  | 1.86938600  | -0.62784400 |
| H  | 4.26647900  | 1.55121600  | -0.89121700 |
| H  | 5.26831500  | -0.71743500 | -0.42116800 |
| H  | 3.70904300  | -2.56491500 | 0.30319800  |
| H  | 1.29769500  | -2.08688000 | 0.52167600  |
| N  | -3.98586200 | -0.08360600 | -0.03357300 |
| O  | -4.22104800 | -1.00665800 | -0.78938200 |
| H  | -4.89967800 | 0.28945400  | 0.33883100  |

2 Lower vibrational modes in 35.3229 cm<sup>-1</sup> and 41.1837 cm<sup>-1</sup>.

1 Imaginary frequency in -147.3394 cm<sup>-1</sup>.

Free Energy = -5047.511324 Hartree

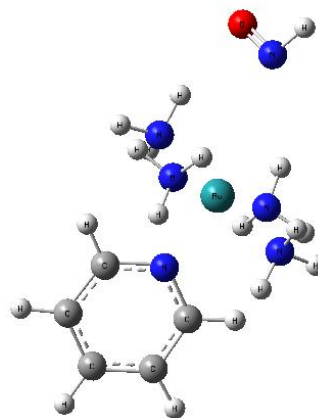

# $trans\text{-}^1[\text{Ru}(\text{NH}_3)_4(\text{py})\text{HNO}]^{2+}$

## PC

2 1

|    |             |             |             |
|----|-------------|-------------|-------------|
| Ru | -0.57348600 | 0.24485800  | 0.19720700  |
| N  | -0.73484800 | 1.19232100  | -1.77274600 |
| N  | -0.20164700 | 2.16998500  | 1.19249500  |
| N  | -0.53083600 | -0.68625900 | 2.18345700  |
| N  | -1.12531300 | -1.64587900 | -0.76207700 |
| H  | -0.05559400 | 0.84388500  | -2.45360600 |
| H  | -1.65107900 | 1.01834100  | -2.19315900 |
| H  | -0.63228100 | 2.20984800  | -1.78125700 |
| H  | -0.87119700 | 2.31623800  | 1.95196600  |
| H  | 0.72033300  | 2.24601100  | 1.62878100  |
| H  | -0.29498200 | 2.99800200  | 0.59915400  |
| H  | 0.35949600  | -0.56897900 | 2.67278600  |
| H  | -1.23457500 | -0.26718500 | 2.79634300  |
| H  | -0.72883100 | -1.68906300 | 2.20652300  |
| H  | -0.99665500 | -2.49254700 | -0.20284600 |
| H  | -2.12466400 | -1.62950100 | -0.99558900 |
| H  | -0.63394600 | -1.82563100 | -1.64061800 |
| N  | 1.44287700  | -0.08372700 | -0.06270500 |
| C  | 2.26217900  | 0.89580500  | -0.51919400 |
| C  | 3.63121800  | 0.71494200  | -0.69471800 |
| C  | 4.20194900  | -0.52348400 | -0.39279100 |
| C  | 3.36345400  | -1.53832500 | 0.07442600  |
| C  | 2.00328500  | -1.28431400 | 0.22461600  |
| H  | 1.80104300  | 1.84873500  | -0.74942500 |
| H  | 4.22910600  | 1.54244400  | -1.06281000 |
| H  | 5.26724700  | -0.69279600 | -0.51801900 |
| H  | 3.74674200  | -2.52240800 | 0.32430500  |
| H  | 1.33642700  | -2.05812800 | 0.58426800  |
| N  | -4.12022800 | -0.06356600 | -0.10310500 |
| O  | -4.22500900 | -1.01676200 | -0.85220200 |
| H  | -5.08569500 | 0.31518600  | 0.09246200  |

2 Lower vibrational modes in  $38.1694\text{ cm}^{-1}$  and  $49.8522\text{ cm}^{-1}$ .

Free Energy = -5047.511443 Hartree

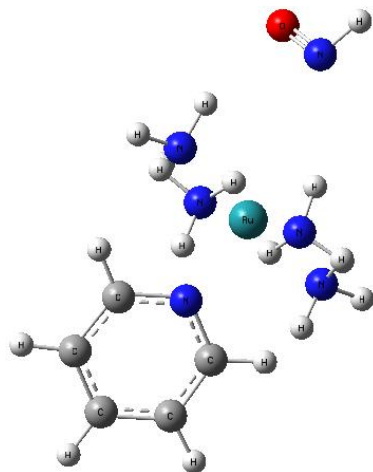

$trans^{-1}[Ru(NH_3)_4(P(OEt)_3)HNO]^{2+}$ 

## RC

| 2 1 |             |             |             |
|-----|-------------|-------------|-------------|
| Ru  | 1.51486500  | 0.14669000  | 0.03169600  |
| N   | 1.39773900  | 1.00448800  | 2.04872400  |
| N   | 1.40003500  | 2.15130000  | -0.85337200 |
| N   | 1.59970800  | -0.78539700 | -1.93401500 |
| N   | 1.65450800  | -1.85703600 | 0.87515800  |
| H   | 2.11824600  | 0.64574000  | 2.67906900  |
| H   | 1.49066800  | 2.02212100  | 2.08103500  |
| H   | 0.49995500  | 0.79588700  | 2.49492000  |
| H   | 0.44539800  | 2.37272500  | -1.14970600 |
| H   | 1.98521700  | 2.26262100  | -1.68470700 |
| H   | 1.67828600  | 2.90782200  | -0.22412000 |
| H   | 1.47013700  | -0.14379900 | -2.71966100 |
| H   | 2.51029100  | -1.23053500 | -2.08147100 |
| H   | 0.89924200  | -1.51977200 | -2.05957600 |
| H   | 1.06925200  | -2.55259700 | 0.40707400  |
| H   | 2.61738700  | -2.19817000 | 0.79586300  |
| H   | 1.41218400  | -1.91962500 | 1.86661900  |
| P   | -0.88174700 | 0.00777500  | -0.01042000 |
| O   | -1.38622100 | -1.39760900 | -0.64371400 |
| O   | -1.52376400 | 0.11294900  | 1.47609800  |
| O   | -1.57305000 | 1.18633600  | -0.88674300 |
| C   | -2.60476100 | -1.63120700 | -1.42949700 |
| C   | -2.50063300 | -3.00860400 | -2.05632700 |
| H   | -3.46915000 | -1.56592800 | -0.76345900 |
| H   | -2.67503400 | -0.84955300 | -2.18971300 |
| H   | -3.40332300 | -3.20266800 | -2.64460600 |
| H   | -1.63498100 | -3.07209300 | -2.72201200 |
| H   | -2.41619700 | -3.78313200 | -1.28865000 |
| C   | -2.66990500 | -0.63523300 | 2.00819300  |
| C   | -2.63652100 | -0.52920800 | 3.52088600  |
| H   | -2.58651100 | -1.67296200 | 1.67713200  |
| H   | -3.58564700 | -0.19835300 | 1.60064500  |
| H   | -2.70762300 | 0.51396700  | 3.84202400  |
| H   | -1.71661900 | -0.96361500 | 3.92291500  |
| H   | -3.48847300 | -1.07684300 | 3.93667000  |
| C   | -2.87362800 | 1.82108800  | -0.63388100 |
| C   | -2.95764800 | 3.07121600  | -1.48882200 |
| H   | -2.93737300 | 2.05712500  | 0.43094300  |
| H   | -3.66288600 | 1.11112700  | -0.89412900 |
| H   | -3.92522900 | 3.55525900  | -1.32109600 |
| H   | -2.16731000 | 3.78000100  | -1.22511800 |
| H   | -2.87477400 | 2.82507700  | -2.55132000 |
| N   | 3.48726000  | 0.23038000  | 0.02080100  |
| O   | 4.27148500  | -0.69209600 | -0.23221400 |
| H   | 4.00324200  | 1.11810900  | 0.21428800  |

2 Lower vibrational modes in 30.8393  $cm^{-1}$  and 36.2163  $cm^{-1}$ .  
Free Energy = -5603.929297 Hartree

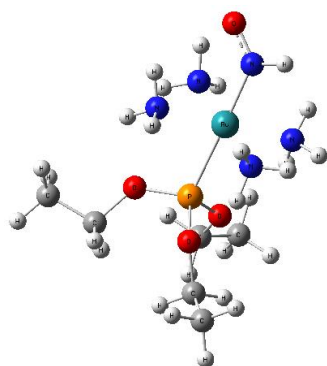 $trans^{-1}[Ru(NH_3)_4(P(OEt)_3)HNO]^{2+}$ 

## TS

| 2 1 |             |             |             |
|-----|-------------|-------------|-------------|
| Ru  | -1.27297800 | 0.38605400  | -0.05461800 |
| N   | -1.35555700 | 0.24962200  | -2.23639700 |
| N   | -0.98841700 | 2.54696200  | -0.14729500 |
| N   | -1.31237600 | 0.50473600  | 2.13477500  |
| N   | -1.78562500 | -1.73682500 | 0.06240000  |
| H   | -2.25483700 | -0.11828900 | -2.55645300 |
| H   | -1.23444300 | 1.13861800  | -2.72621900 |
| H   | -0.63728600 | -0.37125700 | -2.61633600 |
| H   | -0.06341300 | 2.83284100  | 0.18246600  |
| H   | -1.67022000 | 3.04633600  | 0.42904200  |
| H   | -1.07998500 | 2.94545700  | -1.08440400 |
| H   | -0.87946100 | 1.34497400  | 2.52370800  |
| H   | -2.27138300 | 0.49712700  | 2.49092000  |
| H   | -0.83601400 | -0.28004100 | 2.58394200  |
| H   | -1.36428800 | -2.23718400 | 0.84773800  |
| H   | -2.80084100 | -1.83673100 | 0.17376100  |
| H   | -1.54158100 | -2.28088600 | -0.76784100 |
| P   | 0.88959900  | -0.00788200 | -0.01279600 |
| O   | 1.29134600  | -1.01608200 | 1.19747800  |
| O   | 1.47618800  | -0.67779800 | -1.37189800 |
| O   | 1.77171500  | 1.33904900  | 0.20931600  |
| C   | 2.54193000  | -0.99178900 | 1.96346600  |
| C   | 2.39030600  | -1.94393200 | 3.13489500  |
| H   | 3.36308600  | -1.30061700 | 1.31063500  |
| H   | 2.71739700  | 0.03279500  | 2.30031000  |
| H   | 3.31542700  | -1.94269800 | 3.72038100  |
| H   | 1.56906200  | -1.63445000 | 3.78791400  |
| H   | 2.20257300  | -2.96431800 | 2.78845900  |
| C   | 2.36186700  | -1.84306000 | -1.46682700 |
| C   | 2.18435100  | -2.46251800 | -2.84046800 |
| H   | 2.10071100  | -2.54697600 | -0.67373000 |
| H   | 3.38998800  | -1.50062500 | -1.31919100 |
| H   | 2.42974700  | -1.74525200 | -3.62904000 |
| H   | 1.15750200  | -2.81144000 | -2.98425700 |
| H   | 2.85740000  | -3.32107300 | -2.93474500 |
| C   | 3.10622000  | 1.61192000  | -0.33590700 |
| C   | 3.34004900  | 3.10981400  | -0.27329900 |
| H   | 3.14390500  | 1.24196400  | -1.36294000 |
| H   | 3.84109700  | 1.07103600  | 0.26650700  |
| H   | 4.33997900  | 3.33297200  | -0.65950200 |
| H   | 2.60714000  | 3.64638200  | -0.88304100 |
| H   | 3.27965900  | 3.47340100  | 0.75664000  |
| N   | -4.60094900 | 0.07998500  | 0.11129900  |
| O   | -4.88546000 | -1.09731900 | 0.21358100  |
| H   | -5.49207300 | 0.64302100  | 0.07794800  |

2 Lower vibrational modes in 35.6555  $cm^{-1}$  and 28.0339  $cm^{-1}$ .  
1 Imaginary frequency in -63.3199  $cm^{-1}$ .  
Free Energy = -5603.895148 Hartree

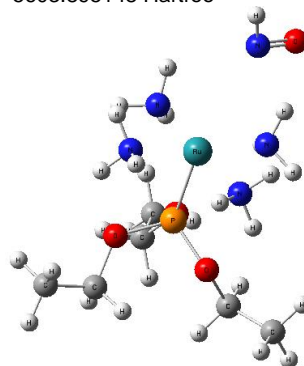

***trans*<sup>-1</sup>[Ru(NH<sub>3</sub>)<sub>4</sub>(P(OEt)<sub>3</sub>)HNO]<sup>2+</sup>**

**PC**

2 1

|    |             |             |             |
|----|-------------|-------------|-------------|
| Ru | -1.25004900 | 0.40947300  | 0.00636100  |
| N  | -1.36557000 | 0.36894200  | -2.17494600 |
| N  | -0.96646600 | 2.57357900  | -0.01557900 |
| N  | -1.30341600 | 0.43136800  | 2.19144800  |
| N  | -1.76440000 | -1.71852100 | 0.04430700  |
| H  | -2.31738700 | 0.16484800  | -2.48995900 |
| H  | -1.10256200 | 1.24408400  | -2.63324500 |
| H  | -0.76485600 | -0.34474600 | -2.59293300 |
| H  | 0.02137700  | 2.83380500  | 0.03817000  |
| H  | -1.42938100 | 3.04182900  | 0.76683400  |
| H  | -1.33459300 | 3.02533700  | -0.85591400 |
| H  | -0.93173200 | 1.28245400  | 2.61882400  |
| H  | -2.26081600 | 0.33991100  | 2.54027300  |
| H  | -0.77102200 | -0.33493400 | 2.60917200  |
| H  | -1.38182000 | -2.24228000 | 0.83408700  |
| H  | -2.78560700 | -1.79900800 | 0.11516200  |
| H  | -1.49809800 | -2.24797300 | -0.78852700 |
| P  | 0.90887100  | 0.00618100  | -0.00577900 |
| O  | 1.34672100  | -0.95852300 | 1.22602300  |
| O  | 1.44736200  | -0.71107200 | -1.36102100 |
| O  | 1.81556200  | 1.35078800  | 0.11976800  |
| C  | 2.65805500  | -0.97550400 | 1.88291000  |
| C  | 2.56343600  | -1.89536200 | 3.08567600  |
| H  | 3.40764200  | -1.33480200 | 1.17234000  |
| H  | 2.90494700  | 0.04701900  | 2.17912700  |
| H  | 3.53199700  | -1.92130800 | 3.59536700  |
| H  | 1.81008900  | -1.53689100 | 3.79323000  |
| H  | 2.30695400  | -2.91387100 | 2.78002700  |
| C  | 2.22239500  | -1.95061900 | -1.45705700 |
| C  | 1.92223300  | -2.59618300 | -2.79708300 |
| H  | 1.94686200  | -2.60624500 | -0.62812300 |
| H  | 3.28120000  | -1.68996500 | -1.37005900 |
| H  | 2.17661200  | -1.92408200 | -3.62180300 |
| H  | 0.86481700  | -2.86677200 | -2.87268400 |
| H  | 2.52035400  | -3.50773800 | -2.89840800 |
| C  | 3.12236400  | 1.57262000  | -0.51127000 |
| C  | 3.41083000  | 3.06174700  | -0.47689300 |
| H  | 3.08098400  | 1.19251500  | -1.53419600 |
| H  | 3.87593500  | 1.01098000  | 0.04734100  |
| H  | 4.39032500  | 3.24747800  | -0.92963500 |
| H  | 2.65866300  | 3.61990500  | -1.04231500 |
| H  | 3.43072000  | 3.43431900  | 0.55142100  |
| N  | -4.81590100 | 0.10112100  | 0.07484800  |
| O  | -4.90445500 | -1.10960500 | 0.15799100  |
| H  | -5.78964000 | 0.50827700  | 0.08289000  |

2 Lower vibrational modes in 19.5071 cm<sup>-1</sup> and 27.7343 cm<sup>-1</sup>.  
Free Energy = -5603.898780 Hartree

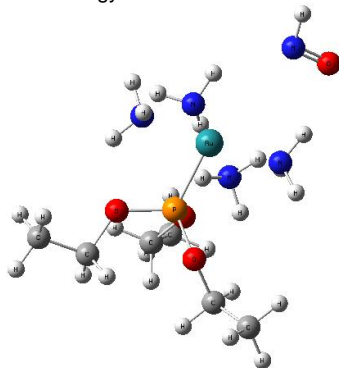

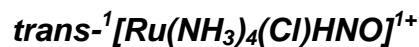

**RC**

| 1 1 |             |             |             |
|-----|-------------|-------------|-------------|
| Ru  | -0.05260700 | 0.08460700  | 0.00115500  |
| N   | 0.45799000  | 1.57974600  | -1.50805700 |
| N   | 0.49003700  | 1.53438000  | 1.54023800  |
| N   | -0.44091400 | -1.44948600 | 1.48572300  |
| N   | -0.48117300 | -1.41690200 | -1.50615800 |
| H   | 1.46414700  | 1.52067800  | -1.68429100 |
| H   | -0.00105400 | 1.45415500  | -2.41278800 |
| H   | 0.27167600  | 2.54901600  | -1.24204300 |
| H   | 0.40957300  | 2.51475700  | 1.26228700  |
| H   | -0.02904100 | 1.45611500  | 2.41727700  |
| H   | 1.47537400  | 1.38529800  | 1.77210900  |
| H   | -0.29100400 | -1.14895000 | 2.45135700  |
| H   | -1.40707600 | -1.78387200 | 1.43779900  |
| H   | 0.16433100  | -2.26286600 | 1.35518500  |
| H   | -1.47914300 | -1.64573500 | -1.52130900 |
| H   | -0.23465600 | -1.14570000 | -2.46040500 |
| H   | 0.01851200  | -2.29150300 | -1.33343800 |
| Cl  | 2.36988200  | -0.59315800 | -0.02446100 |
| N   | -1.89304800 | 0.56844600  | 0.02273400  |
| O   | -2.88531700 | -0.19043000 | 0.00312500  |
| H   | -2.18264000 | 1.56973900  | 0.05690600  |

2 Lower vibrational modes in 81.1325 cm<sup>-1</sup> and 88.0855 cm<sup>-1</sup>.  
Free Energy = -5259.689389 Hartree

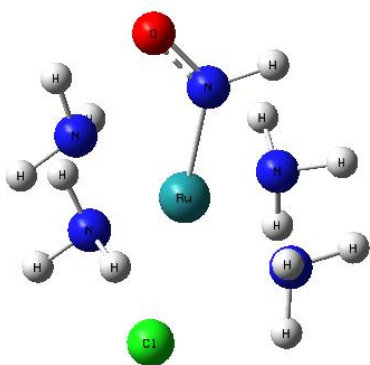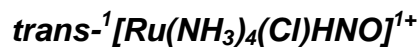

**TS**

| 1 1 |             |             |             |
|-----|-------------|-------------|-------------|
| Ru  | -0.03429800 | 0.06448100  | 0.01858300  |
| N   | -0.01648400 | -0.93586000 | 1.95814000  |
| N   | -0.55329800 | 1.96477000  | 0.96039100  |
| N   | -0.18981400 | 1.00475700  | -1.94529100 |
| N   | 0.47801900  | -1.83283100 | -0.92192300 |
| H   | -0.93201100 | -1.35999900 | 2.12637300  |
| H   | 0.66884400  | -1.69049400 | 2.03241200  |
| H   | 0.16261500  | -0.32384300 | 2.75674600  |
| H   | -0.21528400 | 2.06983300  | 1.91922400  |
| H   | -0.22336500 | 2.79605400  | 0.46504500  |
| H   | -1.57182200 | 2.04873900  | 1.00866000  |
| H   | -0.04947100 | 2.01684800  | -1.94558400 |
| H   | 0.46342100  | 0.63905700  | -2.64099300 |
| H   | -1.12858000 | 0.84947700  | -2.32093900 |
| H   | 1.48878100  | -1.99324200 | -0.91681900 |
| H   | 0.05550600  | -2.63860600 | -0.45649400 |
| H   | 0.18321500  | -1.89957900 | -1.89807600 |
| Cl  | -2.41315700 | -0.44557500 | -0.12836400 |
| N   | 2.37477300  | 0.51601200  | 0.14732500  |
| O   | 3.27746400  | -0.28138200 | -0.06970700 |
| H   | 2.75886700  | 1.45648200  | 0.40214300  |

2 Lower vibrational modes in 20.9541 cm<sup>-1</sup> and 89.0222 cm<sup>-1</sup>.  
1 Imaginary frequency in -179.1106 cm<sup>-1</sup>.  
Free Energy = -5259.654791 Hartree

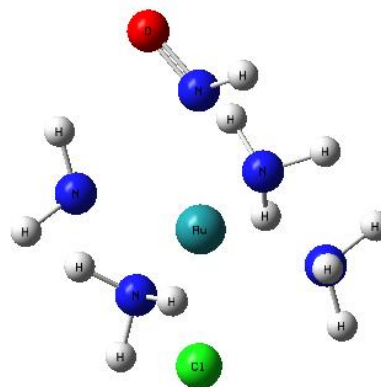



*trans*-<sup>1</sup>[Ru(NH<sub>3</sub>)<sub>4</sub>(Br)HNO]<sup>1+</sup>

**RC**

|     |             |             |             |
|-----|-------------|-------------|-------------|
| 1 1 |             |             |             |
| Ru  | -0.42043600 | 0.11646500  | -0.00135700 |
| N   | -0.61605100 | -1.41705600 | -1.52546800 |
| N   | -0.12342800 | 1.69109900  | -1.49072700 |
| N   | -0.12023800 | 1.61677000  | 1.56126300  |
| N   | -0.62227800 | -1.47004800 | 1.46602300  |
| H   | -1.52628400 | -1.88220900 | -1.46703000 |
| H   | -0.53446300 | -1.07837000 | -2.48656900 |
| H   | 0.09628700  | -2.14361700 | -1.42901800 |
| H   | -0.60964400 | 2.57168200  | -1.30797600 |
| H   | 0.87369100  | 1.91545500  | -1.53169800 |
| H   | -0.39082300 | 1.42744500  | -2.44144900 |
| H   | -0.65953200 | 1.46036000  | 2.41553600  |
| H   | 0.86539600  | 1.60728400  | 1.83522100  |
| H   | -0.32442400 | 2.57856600  | 1.28174400  |
| H   | -1.57477300 | -1.84579200 | 1.47299900  |
| H   | 0.00412700  | -2.25473600 | 1.27581600  |
| H   | -0.41929300 | -1.18468300 | 2.42626100  |
| N   | -2.31428800 | 0.33467500  | -0.00710800 |
| O   | -3.18545300 | -0.55859000 | 0.01249500  |
| H   | -2.74447400 | 1.28492800  | -0.03395100 |
| Br  | 2.21431500  | -0.24000400 | -0.00222900 |

2 Lower vibrational modes in 77.4797 cm<sup>-1</sup> and 95.9050 cm<sup>-1</sup>.  
Free Energy = -7373.218464 Hartree

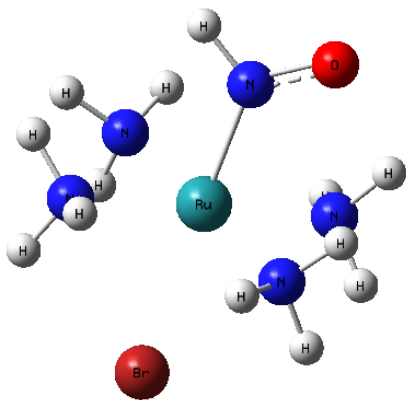

*trans*-<sup>1</sup>[Ru(NH<sub>3</sub>)<sub>4</sub>(Br)HNO]<sup>1+</sup>

**TS**

|     |             |             |             |
|-----|-------------|-------------|-------------|
| 1 1 |             |             |             |
| Ru  | 0.17285400  | 0.28710000  | 0.00340600  |
| N   | 0.27995300  | 0.05486300  | 2.17742100  |
| N   | -0.58256900 | 2.33152500  | 0.23611100  |
| N   | 0.08015100  | 0.50910900  | -2.17573900 |
| N   | 0.94890700  | -1.74127600 | -0.23970200 |
| H   | 0.00372600  | -0.87892800 | 2.48739300  |
| H   | 1.21866300  | 0.20899000  | 2.55235200  |
| H   | -0.33227800 | 0.69556800  | 2.68660200  |
| H   | -0.17269300 | 3.00707900  | -0.41270100 |
| H   | -1.59167500 | 2.35510800  | 0.07108200  |
| H   | -0.44326100 | 2.73234200  | 1.16615600  |
| H   | 0.83249300  | 0.03252800  | -2.67752500 |
| H   | -0.79412300 | 0.11514300  | -2.53175100 |
| H   | 0.10381100  | 1.47681600  | -2.50373000 |
| H   | 1.97091500  | -1.76803200 | -0.16444300 |
| H   | 0.58991700  | -2.39739900 | 0.45648200  |
| H   | 0.71763800  | -2.15711200 | -1.14419900 |
| N   | 3.75265500  | 0.32648500  | -0.00476200 |
| O   | 4.01661100  | -0.86125800 | -0.02603100 |
| H   | 4.65701100  | 0.86788900  | 0.05755100  |
| Br  | -2.22435100 | -0.58277900 | 0.00176700  |

2 Lower vibrational modes in 27.0968 cm<sup>-1</sup> and 57.1753 cm<sup>-1</sup>.  
1 Imaginary frequency in -84.0363 cm<sup>-1</sup>.  
Free Energy = -7373.158241 Hartree

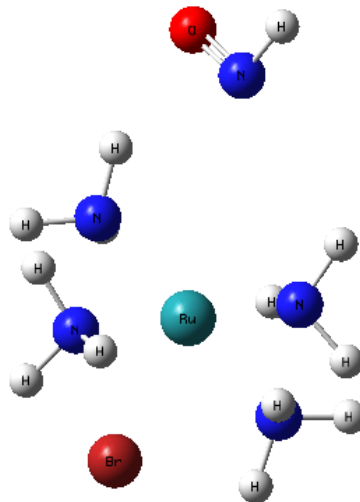

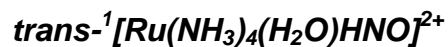

**RC**

| 2 1 |             |             |             |
|-----|-------------|-------------|-------------|
| Ru  | -0.12053100 | 0.00658300  | -0.01233900 |
| N   | 0.49293500  | -1.85438100 | 0.92299600  |
| N   | 0.75623900  | 1.07409700  | 1.66797200  |
| N   | -0.83041900 | 1.90046600  | -0.84134900 |
| N   | -1.06901800 | -1.09965800 | -1.64498800 |
| H   | 0.01800600  | -2.02720500 | 1.81221400  |
| H   | 0.32016300  | -2.68634800 | 0.35430400  |
| H   | 1.49628800  | -1.85909600 | 1.12567800  |
| H   | 1.74960400  | 1.24956100  | 1.49119900  |
| H   | 0.33364600  | 1.98658800  | 1.85424700  |
| H   | 0.72049000  | 0.56876200  | 2.55639800  |
| H   | -1.15955700 | 1.85355900  | -1.80829400 |
| H   | -1.61654800 | 2.27097600  | -0.30133300 |
| H   | -0.12095300 | 2.63699800  | -0.83259100 |
| H   | -0.45509800 | -1.76620000 | -2.11935800 |
| H   | -1.85455200 | -1.65320200 | -1.29311500 |
| H   | -1.45843100 | -0.51587200 | -2.38875600 |
| O   | -2.09299400 | -0.21628300 | 1.04908400  |
| H   | -2.17374500 | -0.05372800 | 2.00559000  |
| H   | -2.92954300 | 0.08398300  | 0.65172200  |
| N   | 1.53711400  | 0.11475000  | -0.90959700 |
| O   | 2.67542300  | 0.01597300  | -0.42291900 |
| H   | 1.56618200  | 0.27712100  | -1.93956900 |

2 Lower vibrational modes in 55.3482  $cm^{-1}$  and 108.4094  $cm^{-1}$ .  
Free Energy = -4875.745213 Hartree

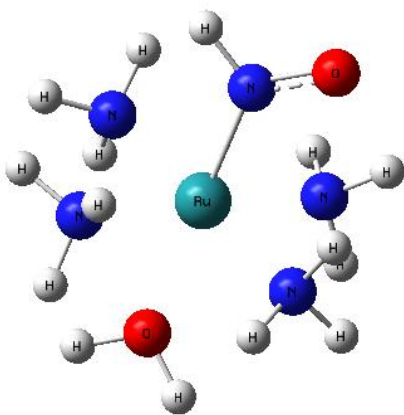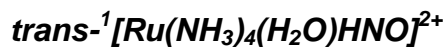

**TS**

| 2 1 |             |             |             |
|-----|-------------|-------------|-------------|
| Ru  | 0.37295300  | 0.01346900  | 0.04893700  |
| N   | 0.45290000  | -2.12063300 | 0.48375100  |
| N   | -0.91899400 | -0.40423200 | -1.66484900 |
| N   | 0.32901700  | 2.15874800  | -0.40902300 |
| N   | 1.62018000  | 0.41581400  | 1.81112700  |
| H   | 1.13145900  | -2.58519900 | -0.12453200 |
| H   | 0.73722100  | -2.34288100 | 1.44025700  |
| H   | -0.43414600 | -2.60896300 | 0.34312600  |
| H   | -1.90496900 | -0.41620300 | -1.38263400 |
| H   | -0.85814800 | 0.27884200  | -2.42358300 |
| H   | -0.74040800 | -1.31060900 | -2.10320100 |
| H   | -0.00542000 | 2.71293600  | 0.38273200  |
| H   | 1.24350500  | 2.54718100  | -0.65106800 |
| H   | -0.28533900 | 2.40343300  | -1.18864600 |
| H   | 1.04799900  | 0.46454000  | 2.65763600  |
| H   | 2.32843200  | -0.29684100 | 2.00190800  |
| H   | 2.12822300  | 1.30237500  | 1.77479300  |
| O   | 2.12533000  | -0.31505100 | -1.16673300 |
| H   | 2.05165800  | 0.01317700  | -2.08184500 |
| H   | 2.94100300  | 0.08567100  | -0.81382200 |
| N   | -2.95465300 | 0.23219200  | 0.92375900  |
| O   | -3.60981500 | -0.09392300 | -0.04737800 |
| H   | -3.61430300 | 0.45848300  | 1.71520100  |

2 Lower vibrational modes in 26.0720  $cm^{-1}$  and 60.1029  $cm^{-1}$ .  
1 Imaginary frequency in -160.5666  $cm^{-1}$ .  
Free Energy = -4875.679065 Hartree

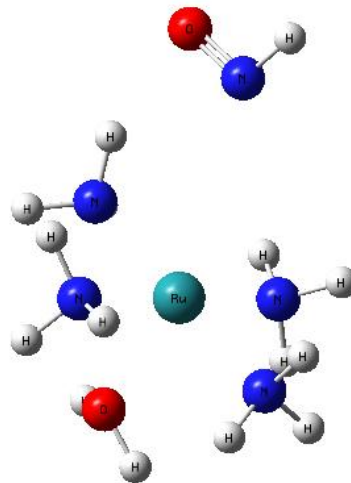

# *trans*-<sup>1</sup>[Ru(NH<sub>3</sub>)<sub>4</sub>(H<sub>2</sub>O)HNO]<sup>2+</sup>

## PC

2 1

|    |             |             |             |
|----|-------------|-------------|-------------|
| Ru | 0.38963600  | 0.01457700  | 0.05212200  |
| N  | 0.45217000  | -2.12921800 | 0.43953100  |
| N  | -0.92738900 | -0.34454300 | -1.65376900 |
| N  | 0.37216200  | 2.17078100  | -0.35659500 |
| N  | 1.65324200  | 0.36580900  | 1.81245100  |
| H  | 1.19789100  | -2.56760100 | -0.10655800 |
| H  | 0.63811800  | -2.37299900 | 1.41475500  |
| H  | -0.40627500 | -2.62733900 | 0.19419300  |
| H  | -1.90741300 | -0.37081900 | -1.35122400 |
| H  | -0.88370000 | 0.36830900  | -2.38580100 |
| H  | -0.75589200 | -1.23175700 | -2.13241900 |
| H  | 0.10418900  | 2.71733900  | 0.46524000  |
| H  | 1.27964500  | 2.54069900  | -0.64899800 |
| H  | -0.28374800 | 2.44810600  | -1.09004300 |
| H  | 1.08428000  | 0.43550300  | 2.65969300  |
| H  | 2.33424300  | -0.37328000 | 2.00163300  |
| H  | 2.19410700  | 1.23277900  | 1.77669600  |
| O  | 2.12990500  | -0.31558600 | -1.17845300 |
| H  | 2.05121800  | 0.01499300  | -2.09226400 |
| H  | 2.95482900  | 0.07204000  | -0.83267500 |
| N  | -3.08802200 | 0.21855100  | 0.94321900  |
| O  | -3.64978400 | -0.09927300 | -0.08825800 |
| H  | -3.82159000 | 0.42186500  | 1.67423000  |

2 Lower vibrational modes in 28.5357 cm<sup>-1</sup> and 65.4357 cm<sup>-1</sup>.  
Free Energy = -4875.679556 Hartree

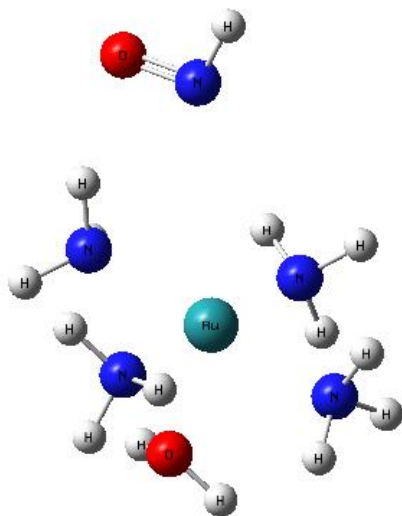

**HNO substitution reactions stationary structures and Free Energies:  
B3LYP/DGDZVP SCRF(IEFPCM,SOLVENT=WATER)**

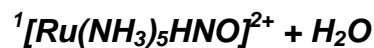

**RC**

| 2 1 |             |             |             |
|-----|-------------|-------------|-------------|
| Ru  | -0.42357900 | -0.06304400 | 0.00242000  |
| N   | -1.14634300 | 1.32205600  | -1.51104100 |
| H   | -2.10541700 | 1.64793500  | -1.37186500 |
| H   | -0.55994700 | 2.16215000  | -1.50725000 |
| N   | 0.21095800  | -1.48017300 | -1.54717300 |
| H   | 0.80451300  | -1.05771200 | -2.26465800 |
| H   | 0.74148400  | -2.27950700 | -1.19387200 |
| N   | 0.26970900  | -1.44489000 | 1.55990100  |
| H   | 0.75388000  | -0.97007400 | 2.32512600  |
| H   | -0.49354900 | -1.96355800 | 2.00074000  |
| N   | -1.11364100 | 1.34692400  | 1.50981400  |
| H   | -0.44647800 | 2.12098900  | 1.58120000  |
| H   | -2.01768400 | 1.77885800  | 1.30575900  |
| N   | -2.41747500 | -1.12654100 | 0.02795400  |
| H   | -3.00505700 | -0.89134900 | -0.77516000 |
| H   | -2.34769600 | -2.14671800 | 0.02084100  |
| H   | -1.11557400 | 0.96142500  | -2.46746000 |
| H   | -0.58057400 | -1.88449100 | -2.05289700 |
| H   | -2.98352100 | -0.89941700 | 0.84875100  |
| H   | 0.92555300  | -2.15605200 | 1.22860600  |
| H   | -1.20144400 | 0.95973400  | 2.45237200  |
| N   | 1.26145400  | 0.84275400  | -0.02235000 |
| O   | 1.44743000  | 2.07678300  | -0.02094000 |
| H   | 2.17286400  | 0.31553900  | -0.03466700 |
| O   | 3.83760500  | -0.53262700 | -0.10156500 |
| H   | 3.84003600  | -1.43622100 | 0.25648300  |
| H   | 4.52315700  | -0.06175800 | 0.40178100  |

2 Lower vibrational modes in 43.7695  $cm^{-1}$  and 61.9260  $cm^{-1}$ .  
Free Energy = -4932.304053 Hartree

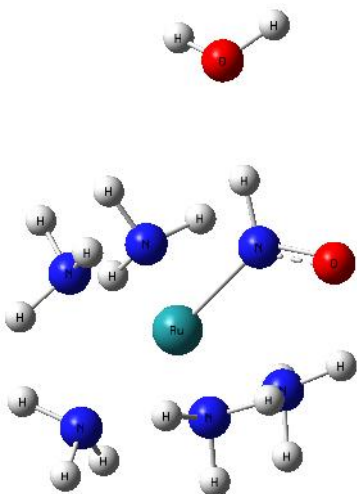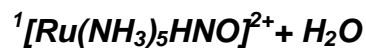

**TSI**

| 2 1 |             |             |             |
|-----|-------------|-------------|-------------|
| Ru  | -0.66457500 | -0.04098400 | 0.00528600  |
| N   | -0.88622000 | -0.19574800 | 2.18145700  |
| H   | -1.51335700 | -0.94101300 | 2.49250300  |
| H   | 0.01302200  | -0.39361100 | 2.62681100  |
| N   | -0.24615600 | 2.09707800  | 0.19605900  |
| H   | 0.77242600  | 2.24559900  | 0.17564600  |
| H   | -0.63391700 | 2.67581500  | -0.55227700 |
| N   | -0.33777500 | 0.09506500  | -2.16089400 |
| H   | 0.39062600  | -0.55230100 | -2.47099200 |
| H   | -1.15662200 | -0.12453400 | -2.73286500 |
| N   | -0.96275700 | -2.20583300 | -0.18868300 |
| H   | -0.07510000 | -2.69492600 | -0.04979600 |
| H   | -1.61048400 | -2.61914500 | 0.48588400  |
| N   | -2.74008300 | 0.33713400  | -0.21441800 |
| H   | -3.14609600 | 0.79028500  | 0.60774700  |
| H   | -2.95899400 | 0.95064300  | -1.00309300 |
| H   | -1.23181400 | 0.65185100  | 2.63739300  |
| H   | -0.57958500 | 2.52258500  | 1.06355300  |
| H   | -3.28945200 | -0.51288000 | -0.36333100 |
| H   | -0.02971200 | 1.01866900  | -2.47264600 |
| H   | -1.30009000 | -2.50590100 | -1.10610500 |
| N   | 2.76944300  | -1.05221100 | 0.12685900  |
| O   | 3.81859400  | -1.67236600 | 0.06580600  |
| H   | 2.97899500  | -0.01860000 | 0.08991000  |
| O   | 2.80282800  | 2.03513000  | 0.03349900  |
| H   | 3.16500600  | 2.41212300  | -0.78641200 |
| H   | 3.29991200  | 2.46814300  | 0.74839100  |

2 Lower vibrational modes in 29.7197  $cm^{-1}$  and 43.5671  $cm^{-1}$ .  
1 Imaginary frequency in -20.9441  $cm^{-1}$ .  
Free Energy = -4932.249516 Hartree

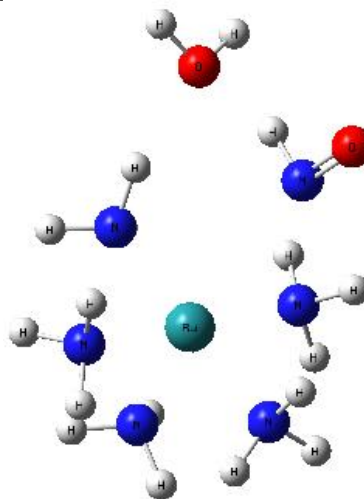

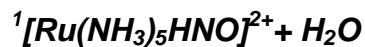

**INT**

| 2 1 |             |             |             |
|-----|-------------|-------------|-------------|
| Ru  | -0.66266000 | -0.04394000 | 0.00775100  |
| N   | -0.89739900 | -0.16210900 | 2.18564100  |
| H   | -1.51599300 | -0.91040200 | 2.50652100  |
| H   | 0.00066600  | -0.33675600 | 2.64294300  |
| N   | -0.35993600 | 2.11346200  | 0.15375500  |
| H   | 0.65229300  | 2.30075100  | 0.14841800  |
| H   | -0.75648900 | 2.65846400  | -0.61501700 |
| N   | -0.33371800 | 0.06238200  | -2.16123500 |
| H   | 0.44240400  | -0.53509200 | -2.45497800 |
| H   | -1.13267000 | -0.23416200 | -2.72661700 |
| N   | -0.78007200 | -2.23542200 | -0.14223900 |
| H   | 0.16074500  | -2.62164000 | -0.02884200 |
| H   | -1.35640000 | -2.69787900 | 0.56420500  |
| N   | -2.75301600 | 0.18743900  | -0.24578400 |
| H   | -3.21015200 | 0.57372300  | 0.58343200  |
| H   | -3.00018300 | 0.81491600  | -1.01482600 |
| H   | -1.26020100 | 0.68961800  | 2.62028500  |
| H   | -0.72817600 | 2.54449700  | 1.00433100  |
| H   | -3.23046000 | -0.69572400 | -0.44162900 |
| H   | -0.09686500 | 0.99824700  | -2.49779600 |
| H   | -1.11702900 | -2.58702300 | -1.04125700 |
| N   | 2.78420300  | -1.03115500 | 0.14540000  |
| O   | 3.89741100  | -1.52421400 | 0.05898100  |
| H   | 2.87672300  | 0.02014100  | 0.11922900  |
| O   | 2.67802300  | 2.07822900  | 0.03775500  |
| H   | 3.04391600  | 2.44854700  | -0.78359000 |
| H   | 3.16104300  | 2.52883300  | 0.75146600  |

2 Lower vibrational modes in 21.9396  $cm^{-1}$  and 48.1023  $cm^{-1}$ .  
Free Energy = -4932.250191 Hartree

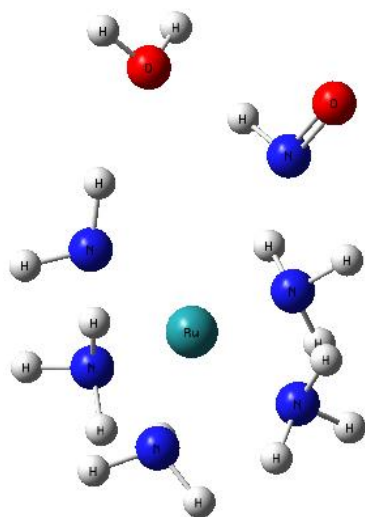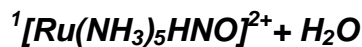

**TSII**

| 2 1 |             |             |             |
|-----|-------------|-------------|-------------|
| Ru  | 0.62136400  | -0.07163500 | 0.00295400  |
| N   | 0.32482300  | 0.25526700  | -2.14642300 |
| H   | 0.69864100  | -0.47788200 | -2.75373700 |
| H   | -0.67160100 | 0.30766500  | -2.37016600 |
| N   | 1.53205900  | 1.90499700  | 0.19127800  |
| H   | 0.75667300  | 2.57361400  | 0.20780700  |
| H   | 2.06668500  | 2.06585300  | 1.04763000  |
| N   | 0.82979800  | -0.36428300 | 2.16940200  |
| H   | 0.15144400  | 0.20046700  | 2.68601800  |
| H   | 0.67857500  | -1.32496800 | 2.48545700  |
| N   | -0.40059000 | -2.01094200 | -0.18487800 |
| H   | -1.41510200 | -1.87807700 | -0.09843800 |
| H   | -0.25378700 | -2.47571500 | -1.08332100 |
| N   | 2.49671400  | -1.00290300 | -0.31704800 |
| H   | 3.26635600  | -0.32974900 | -0.34090800 |
| H   | 2.73791500  | -1.67685000 | 0.41354200  |
| H   | 0.72805400  | 1.12644100  | -2.49797400 |
| H   | 2.14778000  | 2.19648400  | -0.57147400 |
| H   | 2.55244200  | -1.52030300 | -1.19763200 |
| H   | 1.74415600  | -0.09934500 | 2.54315400  |
| H   | -0.14250500 | -2.70347000 | 0.52121900  |
| N   | -3.18736000 | -0.49249700 | 0.04436500  |
| O   | -4.40329900 | -0.44840900 | 0.10969700  |
| H   | -2.80034100 | 0.48952700  | 0.05884200  |
| O   | -1.49864000 | 2.11883400  | 0.15874700  |
| H   | -1.78115400 | 2.59484700  | 0.95860900  |
| H   | -1.75685100 | 2.69251100  | -0.58304600 |

2 Lower vibrational modes in 27.7778  $cm^{-1}$  and 54.0471  $cm^{-1}$ .  
1 Imaginary frequency in -116.2609  $cm^{-1}$ .  
Free Energy = -4932.246345 Hartree

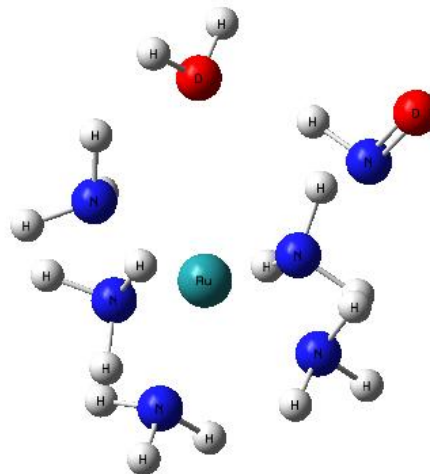

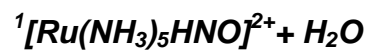

PC

2 1

|    |             |             |             |
|----|-------------|-------------|-------------|
| Ru | -0.66726700 | -0.01112700 | 0.00318500  |
| N  | -0.71243100 | 0.59243600  | 2.11881600  |
| H  | -1.23306400 | -0.04711500 | 2.72397200  |
| H  | 0.22040500  | 0.64548700  | 2.53487100  |
| N  | -2.17275100 | 1.52407500  | -0.47081200 |
| H  | -1.77751400 | 2.46314300  | -0.56009700 |
| H  | -2.67336400 | 1.35804500  | -1.34708300 |
| N  | -0.56237800 | -0.61401600 | -2.11012000 |
| H  | -0.99101500 | 0.05031400  | -2.75857700 |
| H  | 0.40028800  | -0.72506500 | -2.43731700 |
| N  | 0.84486900  | -1.52353800 | 0.48056000  |
| H  | 1.79908100  | -1.16341000 | 0.36112900  |
| H  | 0.79400700  | -1.86252400 | 1.44400100  |
| N  | -2.24269600 | -1.44389700 | 0.35115700  |
| H  | -2.94175600 | -1.46489900 | -0.39536800 |
| H  | -1.90505800 | -2.40567200 | 0.43593600  |
| H  | -1.13048300 | 1.51196600  | 2.27777800  |
| H  | -2.90308900 | 1.60475400  | 0.24032100  |
| H  | -2.77304200 | -1.26670800 | 1.20737400  |
| H  | -1.01528800 | -1.50985600 | -2.30504000 |
| H  | 0.79297200  | -2.36182800 | -0.10286400 |
| N  | 3.69325800  | -0.04473600 | -0.02451200 |
| O  | 4.90520500  | -0.05396200 | 0.06272900  |
| H  | 3.37176800  | 0.89602100  | -0.37735100 |
| O  | 1.01483000  | 1.46074200  | -0.37402000 |
| H  | 0.98515000  | 1.87162400  | -1.25632800 |
| H  | 1.04435300  | 2.20880200  | 0.24922200  |

2 Lower vibrational modes in  $55.6446 \text{ cm}^{-1}$  and  $71.2222 \text{ cm}^{-1}$ .  
Free Energy = -4932.258230 Hartree

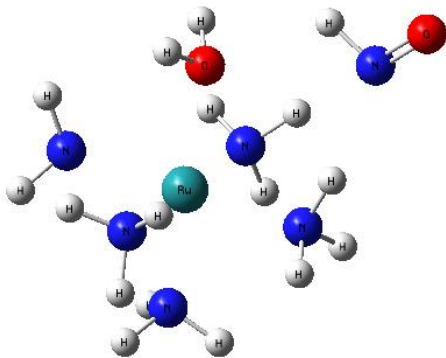

***trans*<sup>-1</sup>[Ru(NH<sub>3</sub>)<sub>4</sub>(P(OEt)<sub>3</sub>)HNO]<sup>2+</sup> + H<sub>2</sub>O**

**RC**

|     |             |             |             |
|-----|-------------|-------------|-------------|
| 2 1 |             |             |             |
| Ru  | -1.27427400 | -0.28079900 | 0.04114000  |
| N   | -1.56328600 | 1.66902700  | -0.91443400 |
| N   | -1.34777200 | 0.69545300  | 2.00325800  |
| N   | -1.08121800 | -2.23333900 | 1.00237600  |
| N   | -1.11764600 | -1.32620700 | -1.86601600 |
| H   | -1.56887100 | 1.62074900  | -1.93559700 |
| H   | -2.45583500 | 2.10671900  | -0.65209800 |
| H   | -0.81912000 | 2.33105200  | -0.68416500 |
| H   | -0.46112100 | 0.60357200  | 2.50569500  |
| H   | -2.06397000 | 0.30640800  | 2.62000300  |
| H   | -1.53749900 | 1.69880300  | 1.95582300  |
| H   | -0.84343000 | -2.20249900 | 1.99608700  |
| H   | -1.98154100 | -2.71846400 | 0.93974400  |
| H   | -0.39328800 | -2.85769000 | 0.57595700  |
| H   | -0.22172000 | -1.80857200 | -1.97501700 |
| H   | -1.84515300 | -2.04128000 | -1.95183800 |
| H   | -1.21422200 | -0.73423200 | -2.69411600 |
| P   | 1.10454700  | 0.06470100  | 0.00246400  |
| O   | 1.85850700  | -1.07162500 | -0.88057600 |
| O   | 1.54166400  | 1.49432600  | -0.63263800 |
| O   | 1.75850700  | 0.02181700  | 1.48994800  |
| C   | 3.16553500  | -1.68499600 | -0.62259300 |
| C   | 3.26103000  | -2.95009600 | -1.45445400 |
| H   | 3.94555900  | -0.97031900 | -0.89857500 |
| H   | 3.23805400  | -1.90322200 | 0.44559500  |
| H   | 4.23359200  | -3.42170900 | -1.28014300 |
| H   | 2.47702900  | -3.66022600 | -1.17571900 |
| H   | 3.17342900  | -2.72473000 | -2.52125400 |
| C   | 2.70197200  | 1.76717200  | -1.48664500 |
| C   | 2.48090300  | 3.10723500  | -2.16291800 |
| H   | 2.78990800  | 0.95990300  | -2.21774400 |
| H   | 3.59836100  | 1.78355900  | -0.86049400 |
| H   | 2.37975300  | 3.90700600  | -1.42350000 |
| H   | 1.58337600  | 3.08593700  | -2.78786500 |
| H   | 3.34157200  | 3.33396700  | -2.80051600 |
| C   | 2.93572100  | 0.77112800  | 1.94832500  |
| C   | 2.99456800  | 0.67530300  | 3.46113700  |
| H   | 2.83325700  | 1.80688000  | 1.61604200  |
| H   | 3.82741400  | 0.33360100  | 1.49152700  |
| H   | 3.87604900  | 1.21684300  | 3.81946200  |
| H   | 2.10709600  | 1.12251300  | 3.91839100  |
| H   | 3.07487200  | -0.36633900 | 3.78512900  |
| N   | -3.22634000 | -0.56055900 | -0.00266500 |
| O   | -3.83552700 | -1.63527600 | -0.09444600 |
| H   | -3.87933300 | 0.26241000  | 0.01325700  |
| O   | -4.42098800 | 2.13478800  | -0.05718100 |
| H   | -5.10773000 | 2.37632800  | -0.70204600 |
| H   | -4.68849500 | 2.56033900  | 0.77526500  |

2 Lower vibrational modes in 17.6490 cm<sup>-1</sup> and 30.6561 cm<sup>-1</sup>.  
Free Energy = -5680.365010 Hartree

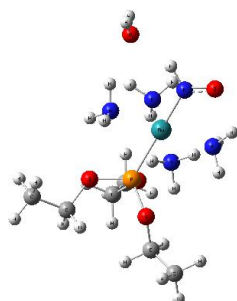

***trans*<sup>-1</sup>[Ru(NH<sub>3</sub>)<sub>4</sub>(P(OEt)<sub>3</sub>)HNO]<sup>2+</sup> + H<sub>2</sub>O**

**TSI**

|     |             |             |             |
|-----|-------------|-------------|-------------|
| 2 1 |             |             |             |
| Ru  | 1.05182400  | 0.03725900  | 0.00227100  |
| N   | 1.23940800  | -2.12426900 | 0.21403000  |
| N   | 1.11308200  | 0.22259100  | 2.18659000  |
| N   | 1.17249500  | 2.19981900  | -0.21973500 |
| N   | 1.11282000  | -0.21835400 | -2.16998500 |
| H   | 0.78611500  | -2.67538400 | -0.51738300 |
| H   | 2.24578200  | -2.34159000 | 0.16887400  |
| H   | 0.89885600  | -2.51082200 | 1.09661400  |
| H   | 1.16265400  | 1.18294700  | 2.53268300  |
| H   | 1.92844800  | -0.25274400 | 2.58075600  |
| H   | 0.29152400  | -0.18975300 | 2.63499000  |
| H   | 0.87259900  | 2.73234500  | 0.59938500  |
| H   | 2.15144900  | 2.45083600  | -0.38122500 |
| H   | 0.63463000  | 2.58490600  | -0.99852700 |
| H   | 0.44069100  | -0.91195900 | -2.50514400 |
| H   | 0.92198700  | 0.63021200  | -2.70667900 |
| H   | 2.03340100  | -0.54003600 | -2.47945700 |
| P   | -1.14271300 | 0.02328000  | -0.01883500 |
| O   | -1.74108000 | -1.07792600 | -1.05534600 |
| O   | -1.78850400 | -0.31194800 | 1.43392500  |
| O   | -1.80677100 | 1.43226200  | -0.47727700 |
| C   | -2.99072000 | -0.94749600 | -1.81318800 |
| C   | -3.01226200 | -2.03282700 | -2.87307200 |
| H   | -3.83203800 | -1.05630400 | -1.12324700 |
| H   | -3.02134600 | 0.04961500  | -2.25840900 |
| H   | -3.94291200 | -1.95639600 | -3.44479500 |
| H   | -2.17271300 | -1.92233400 | -3.56581400 |
| H   | -2.96809400 | -3.02668800 | -2.41831200 |
| C   | -2.96879900 | -1.13515300 | 1.70944900  |
| C   | -2.91569300 | -1.55742400 | 3.16602400  |
| H   | -2.95263400 | -2.00090600 | 1.04325700  |
| H   | -3.86268700 | -0.53905100 | 1.50452800  |
| H   | -2.91815300 | -0.68590300 | 3.82715000  |
| H   | -2.02050500 | -2.15329400 | 3.36712800  |
| H   | -3.79606300 | -2.16658100 | 3.39561200  |
| C   | -2.95864700 | 2.10176800  | 0.13144600  |
| C   | -2.87356400 | 3.57994900  | -0.20218100 |
| H   | -2.93247200 | 1.93411000  | 1.21049600  |
| H   | -3.86990800 | 1.65602400  | -0.27816500 |
| H   | -3.73567700 | 4.09703900  | 0.23187500  |
| H   | -1.96151600 | 4.02148100  | 0.21025400  |
| H   | -2.88573800 | 3.73881300  | -1.28442100 |
| N   | 4.26566400  | 0.90875300  | -0.06539100 |
| O   | 5.23500600  | 1.64659700  | -0.05211900 |
| H   | 4.58452100  | -0.09684000 | -0.02529700 |
| O   | 4.27569200  | -2.16754300 | 0.06533400  |
| H   | 4.64749000  | -2.62400800 | -0.70871600 |
| H   | 4.73185400  | -2.56053800 | 0.82902800  |

2 Lower vibrational modes in 19.2476 and 28.0850 cm<sup>-1</sup>.  
1 Imaginary frequency in -50.0432 cm<sup>-1</sup>.  
Free Energy = -5680.328558 Hartree

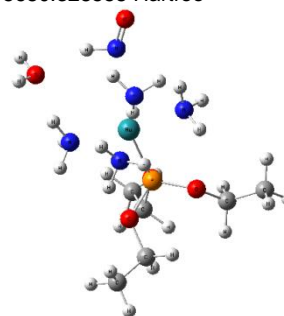

***trans*<sup>-1</sup>[Ru(NH<sub>3</sub>)<sub>4</sub>(P(OEt)<sub>3</sub>)HNO]<sup>2+</sup> + H<sub>2</sub>O  
INT**

| 2 1 |             |             |             |
|-----|-------------|-------------|-------------|
| Ru  | -1.02539000 | -0.02207600 | 0.13369000  |
| N   | -1.07894100 | -2.19327700 | -0.03525000 |
| N   | -1.24308500 | 0.09450500  | -2.03661900 |
| N   | -1.32709000 | 2.13068200  | 0.29227700  |
| N   | -0.97756400 | -0.20483400 | 2.31482800  |
| H   | -0.69235900 | -2.71459200 | 0.75368900  |
| H   | -2.07827700 | -2.43521900 | -0.09199000 |
| H   | -0.63350900 | -2.58360700 | -0.86810000 |
| H   | -1.21549300 | 1.04131300  | -2.42083300 |
| H   | -2.13836400 | -0.29884400 | -2.33759600 |
| H   | -0.52009000 | -0.42541100 | -2.53953500 |
| H   | -0.88988200 | 2.68476000  | -0.44653900 |
| H   | -2.33743900 | 2.30042200  | 0.23288100  |
| H   | -1.01351000 | 2.55442900  | 1.16763100  |
| H   | -0.20430500 | -0.78853900 | 2.64125800  |
| H   | -0.87674200 | 0.68232300  | 2.81194500  |
| H   | -1.83460400 | -0.63030500 | 2.67689300  |
| P   | 1.16156400  | 0.06005100  | 0.00902200  |
| O   | 1.88269500  | -0.70335700 | 1.25080700  |
| O   | 1.71622300  | -0.65920400 | -1.34131300 |
| O   | 1.79228800  | 1.55560200  | -0.00625100 |
| C   | 3.16498100  | -0.34389500 | 1.86354100  |
| C   | 3.25059600  | -1.03791500 | 3.21033900  |
| H   | 3.97059800  | -0.67099400 | 1.20029600  |
| H   | 3.20706100  | 0.74253100  | 1.97021900  |
| H   | 4.20999400  | -0.79604300 | 3.67919400  |
| H   | 2.44834600  | -0.70363500 | 3.87483300  |
| H   | 3.18708300  | -2.12400900 | 3.09622900  |
| C   | 2.91447900  | -1.49351400 | -1.45697600 |
| C   | 2.80458700  | -2.29470100 | -2.74100400 |
| H   | 2.96891200  | -2.14786400 | -0.58376200 |
| H   | 3.79256400  | -0.84116100 | -1.47157100 |
| H   | 2.73409800  | -1.63442200 | -3.61031200 |
| H   | 1.92640800  | -2.94688300 | -2.71864500 |
| H   | 3.69694600  | -2.91907700 | -2.85334000 |
| C   | 2.90376200  | 2.02668100  | -0.83656700 |
| C   | 2.80746900  | 3.53774700  | -0.93938500 |
| H   | 2.83216900  | 1.55459700  | -1.81910000 |
| H   | 3.84144000  | 1.72368100  | -0.36142100 |
| H   | 3.64012400  | 3.91016900  | -1.54525200 |
| H   | 1.87033200  | 3.83819500  | -1.41722000 |
| H   | 2.86607500  | 4.00295900  | 0.04896700  |
| N   | -4.47874500 | 1.05478600  | 0.01458900  |
| O   | -5.65881200 | 1.35643700  | -0.04433700 |
| H   | -4.39160300 | 0.00608400  | -0.08108600 |
| O   | -4.09810700 | -2.04689400 | -0.21899000 |
| H   | -4.60594700 | -2.49536900 | 0.47885600  |
| H   | -4.47791400 | -2.37503000 | -1.05207600 |

2 Lower vibrational modes in 21.6239 cm<sup>-1</sup> and 26.2983 cm<sup>-1</sup>.  
Free Energy = -5680.328800 Hartree

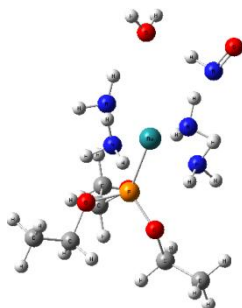

***trans*<sup>-1</sup>[Ru(NH<sub>3</sub>)<sub>4</sub>(P(OEt)<sub>3</sub>)HNO]<sup>2+</sup> + H<sub>2</sub>O  
TSII**

| 2 1 |             |             |             |
|-----|-------------|-------------|-------------|
| Ru  | -1.01643700 | -0.37665100 | 0.16576200  |
| N   | -0.74037900 | -2.44379000 | -0.46075800 |
| N   | -1.34707100 | 0.17057500  | -1.92702900 |
| N   | -1.50953400 | 1.66066900  | 0.77573300  |
| N   | -0.83416800 | -1.00150500 | 2.25456100  |
| H   | -0.29239900 | -3.05722600 | 0.22262300  |
| H   | -1.67908500 | -2.82046400 | -0.62156300 |
| H   | -0.21749100 | -2.56992100 | -1.32945300 |
| H   | -1.37930900 | 1.17690300  | -2.10323200 |
| H   | -2.24442500 | -0.19623900 | -2.25313300 |
| H   | -0.64165200 | -0.19583300 | -2.57038200 |
| H   | -0.96032200 | 2.36846400  | 0.28414100  |
| H   | -2.50022100 | 1.85715000  | 0.58651200  |
| H   | -1.36813600 | 1.85475900  | 1.76907000  |
| H   | 0.05464000  | -1.46938900 | 2.44515000  |
| H   | -0.88953800 | -0.24015000 | 2.93442000  |
| H   | -1.57098600 | -1.66051700 | 2.51811000  |
| P   | 1.12535000  | 0.07786500  | 0.01451800  |
| O   | 2.02442100  | -0.60126700 | 1.18628000  |
| O   | 1.74881300  | -0.45994400 | -1.38839300 |
| O   | 1.46159600  | 1.66740400  | 0.06811900  |
| C   | 3.20247400  | -0.00693300 | 1.82589700  |
| C   | 3.49291500  | -0.78889100 | 3.09329100  |
| H   | 4.04221700  | -0.06382200 | 1.12763200  |
| H   | 2.98717400  | 1.04177900  | 2.04379700  |
| H   | 4.37624800  | -0.36448300 | 3.58149800  |
| H   | 2.65198700  | -0.73041400 | 3.79054500  |
| C   | 3.69528700  | -1.84006800 | 2.86835000  |
| H   | 3.09462400  | -1.00380300 | -1.59210800 |
| C   | 3.11739100  | -1.70557400 | -2.93735900 |
| H   | 3.31526600  | -1.69620500 | -0.77622900 |
| H   | 3.81347500  | -0.17973000 | -1.56755600 |
| H   | 2.88430000  | -1.00824400 | -3.74730100 |
| H   | 2.39809700  | -2.52950400 | -2.96129500 |
| H   | 4.11783600  | -2.11473300 | -3.11196000 |
| C   | 2.47120800  | 2.37676600  | -0.72230500 |
| C   | 2.11558600  | 3.85210800  | -0.72267400 |
| H   | 2.47364600  | 1.96708900  | -1.73500600 |
| H   | 3.44989800  | 2.20766500  | -0.26396500 |
| H   | 2.86774300  | 4.40275400  | -1.29707000 |
| H   | 1.13803300  | 4.01898400  | -1.18474700 |
| H   | 2.09949800  | 4.25158400  | 0.29552100  |
| N   | -4.59748000 | 1.20561700  | 0.08384500  |
| O   | -5.74940700 | 1.58640800  | -0.02409400 |
| H   | -4.54732500 | 0.17147100  | -0.12300700 |
| O   | -3.70856500 | -1.73217500 | -0.37673200 |
| H   | -4.06959400 | -2.25071700 | 0.36293000  |
| H   | -4.14153000 | -2.09267400 | -1.17006700 |

2 Lower vibrational modes in 20.4384 cm<sup>-1</sup> and 22.6360 cm<sup>-1</sup>.  
1 Imaginary frequency in -47.4859 cm<sup>-1</sup>.  
Free Energy = -5680.326984 Hartree

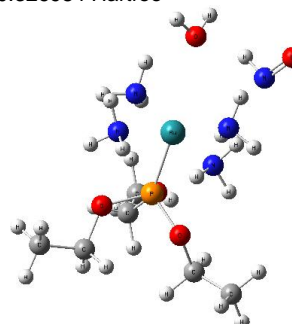



***trans*<sup>-1</sup>[Ru(NH<sub>3</sub>)<sub>4</sub>(P(OEt)<sub>3</sub>)HNO]<sup>2+</sup> + H<sub>2</sub>O**  
**PC**

2 1

|    |             |             |             |
|----|-------------|-------------|-------------|
| Ru | -0.98978700 | -0.67778200 | -0.00238400 |
| N  | -0.35127500 | -2.62901400 | -0.78826900 |
| N  | -1.32165000 | 0.03121300  | -2.04475400 |
| N  | -1.76170900 | 1.23291000  | 0.72047500  |
| N  | -0.81353800 | -1.39938700 | 2.06057800  |
| H  | -0.26038700 | -3.35904000 | -0.07840900 |
| H  | -0.98781600 | -3.01210200 | -1.49106700 |
| H  | 0.56334100  | -2.57308500 | -1.24332400 |
| H  | -1.04730300 | 1.00485400  | -2.19132200 |
| H  | -2.31321400 | -0.01745800 | -2.29219900 |
| H  | -0.82869500 | -0.50061900 | -2.76497600 |
| H  | -1.31239700 | 2.03896500  | 0.27956800  |
| H  | -2.76748200 | 1.31978900  | 0.52598800  |
| H  | -1.65105200 | 1.38199100  | 1.72582500  |
| H  | 0.10307700  | -1.17483800 | 2.45630500  |
| H  | -1.49922300 | -0.98449900 | 2.69610600  |
| H  | -0.92676700 | -2.41031000 | 2.16414100  |
| P  | 1.09994000  | 0.08652800  | 0.00914300  |
| O  | 1.83503900  | -0.03227800 | 1.46154600  |
| O  | 2.09118000  | -0.69048300 | -1.02698900 |
| O  | 1.19237600  | 1.66060700  | -0.39785800 |
| C  | 2.74649100  | 0.94565000  | 2.05743100  |
| C  | 2.87485300  | 0.62872700  | 3.53603300  |
| H  | 3.71523500  | 0.87185500  | 1.55465200  |
| H  | 2.33626000  | 1.94597800  | 1.89861400  |
| H  | 3.56315400  | 1.34332800  | 3.99901800  |
| H  | 1.90589900  | 0.70785300  | 4.03781200  |
| H  | 3.27136900  | -0.37949300 | 3.68761400  |
| C  | 3.51815000  | -0.94665500 | -0.81855900 |
| C  | 3.99355000  | -1.87584100 | -1.92015800 |
| H  | 3.64672500  | -1.39667100 | 0.16896000  |
| H  | 4.05745900  | 0.00423600  | -0.84964300 |
| H  | 3.85034300  | -1.42153100 | -2.90492700 |
| H  | 3.45627200  | -2.82835700 | -1.88779300 |
| H  | 5.06113400  | -2.07760400 | -1.78505500 |
| C  | 2.26219900  | 2.31442200  | -1.15276300 |
| C  | 1.74121300  | 3.65586000  | -1.63535400 |
| H  | 2.54042000  | 1.67085600  | -1.99091600 |
| H  | 3.12790900  | 2.44206900  | -0.49622000 |
| H  | 2.52652800  | 4.16536100  | -2.20317500 |
| H  | 0.87261000  | 3.52389400  | -2.28730800 |
| H  | 1.45726400  | 4.29208800  | -0.79196800 |
| N  | -4.88844700 | 1.17034400  | -0.09055500 |
| O  | -5.94882900 | 1.72803000  | 0.10896300  |
| H  | -5.05776000 | 0.27331600  | -0.61973600 |
| O  | -3.19888700 | -1.38305100 | -0.01845900 |
| H  | -3.55429200 | -1.64788900 | 0.84845400  |
| H  | -3.42652400 | -2.11648000 | -0.61699000 |

2 Lower vibrational modes in 8.9626 cm<sup>-1</sup> and 26.2410 cm<sup>-1</sup>.  
 Free Energy = -5680.336681 Hartree

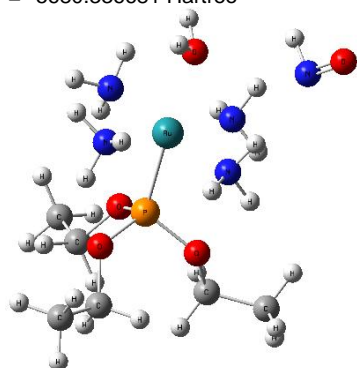

***trans*<sup>-1</sup>[Ru(NH<sub>3</sub>)<sub>4</sub>(H<sub>2</sub>O)HNO]<sup>2+</sup> + H<sub>2</sub>O**

**RC**

|     |             |             |             |
|-----|-------------|-------------|-------------|
| 2 1 |             |             |             |
| Ru  | -0.37394600 | -0.06579700 | 0.00939500  |
| N   | -0.23205100 | -0.77302500 | -2.04311300 |
| N   | 0.93067400  | -1.71295300 | 0.63574300  |
| N   | -0.74014400 | 0.51796500  | 2.07330600  |
| N   | -1.68508500 | 1.55660500  | -0.63141100 |
| H   | -0.25109700 | -0.03606300 | -2.75135700 |
| H   | 0.60155000  | -1.32878400 | -2.24619400 |
| H   | -1.03344300 | -1.37982000 | -2.23627700 |
| H   | 1.93054300  | -1.50123700 | 0.51917700  |
| H   | 0.81141400  | -1.97455600 | 1.61705400  |
| H   | 0.76639300  | -2.57384800 | 0.10863200  |
| H   | -0.74537600 | 1.53269800  | 2.20174000  |
| H   | -1.64948200 | 0.18610800  | 2.40407100  |
| H   | -0.05311200 | 0.16075100  | 2.74080400  |
| H   | -1.12722200 | 2.40750900  | -0.74500200 |
| H   | -2.15511800 | 1.39795700  | -1.52544700 |
| H   | -2.42965200 | 1.79135800  | 0.02926300  |
| O   | -2.14062200 | -1.47931100 | 0.08891200  |
| H   | -2.08679700 | -2.30563400 | 0.60090300  |
| H   | -3.03516100 | -1.12741200 | 0.24265300  |
| N   | 1.11441500  | 1.09478800  | -0.12084000 |
| O   | 1.12877200  | 2.33806300  | -0.15862200 |
| H   | 2.08023100  | 0.68437300  | -0.15219400 |
| O   | 3.60428200  | -0.47229000 | 0.00934200  |
| H   | 4.27813400  | -0.23002300 | 0.66742900  |
| H   | 4.09770200  | -0.68364900 | -0.80149900 |

2 Lower vibrational modes in 38.0939 cm<sup>-1</sup> and 83.3522 cm<sup>-1</sup>.  
Free Energy = -4952.180141 Hartree

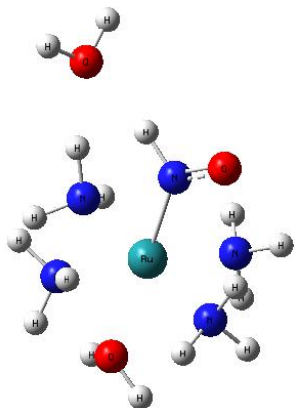

***trans*<sup>-1</sup>[Ru(NH<sub>3</sub>)<sub>4</sub>(H<sub>2</sub>O)HNO]<sup>2+</sup> + H<sub>2</sub>O**

**TSI**

|     |             |             |             |
|-----|-------------|-------------|-------------|
| 2 1 |             |             |             |
| Ru  | 0.69315600  | -0.05894000 | 0.01370600  |
| N   | 0.58459200  | 0.00674200  | -2.16354900 |
| N   | 0.19867700  | 2.06619300  | 0.08281900  |
| N   | 0.84217400  | -0.12780300 | 2.20047700  |
| N   | 1.10381800  | -2.21111300 | -0.08131700 |
| H   | 0.35908100  | -0.88960300 | -2.60042100 |
| H   | -0.10323700 | 0.66891800  | -2.52862600 |
| H   | 1.48560900  | 0.29126500  | -2.55552700 |
| H   | -0.82568700 | 2.17487900  | 0.07491800  |
| H   | 0.53095200  | 2.56639000  | 0.91048400  |
| H   | 0.54778400  | 2.60283600  | -0.71463600 |
| H   | 1.69633200  | -0.57389400 | 2.54255400  |
| H   | 0.81855100  | 0.78991900  | 2.65022600  |
| H   | 0.07121500  | -0.65481400 | 2.61765600  |
| H   | 0.25221500  | -2.73701900 | -0.29232300 |
| H   | 1.77718600  | -2.48045800 | -0.80225000 |
| H   | 1.46174300  | -2.61176300 | 0.78841000  |
| O   | 2.78167800  | 0.42087600  | -0.22707100 |
| H   | 3.03651800  | 1.27645500  | 0.16468200  |
| H   | 3.40195300  | -0.23099000 | 0.14797800  |
| N   | -2.99650400 | -1.12930100 | 0.01425100  |
| O   | -4.17928900 | -1.43543500 | 0.02411300  |
| H   | -2.93448600 | -0.07585200 | 0.01831500  |
| O   | -2.81456400 | 1.95653200  | 0.02609000  |
| H   | -3.27905600 | 2.35524900  | 0.78184800  |
| H   | -3.22743100 | 2.35305500  | -0.76018100 |

2 Lower vibrational modes in 5.7183 and 20.0146cm<sup>-1</sup>.  
1 Imaginary frequency in -19.1966 cm<sup>-1</sup>.  
Free Energy = -4952.112640 Hartree

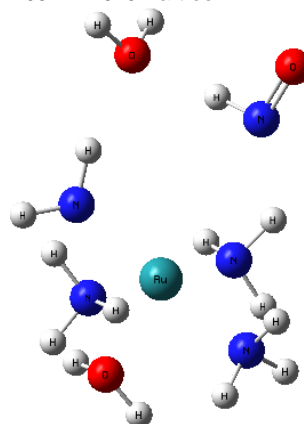

***trans*<sup>-1</sup>[Ru(NH<sub>3</sub>)<sub>4</sub>(H<sub>2</sub>O)HNO]<sup>2+</sup> + H<sub>2</sub>O  
INT**

| 2 1 |             |             |             |
|-----|-------------|-------------|-------------|
| Ru  | 0.65001800  | -0.04228500 | 0.00123400  |
| N   | 0.95755100  | -0.11229800 | -2.15429400 |
| N   | 0.33558200  | 2.11059200  | -0.12071700 |
| N   | 0.34634700  | 0.03284100  | 2.17204400  |
| N   | 0.79467300  | -2.22987100 | 0.11250900  |
| H   | 0.78413000  | -1.02726800 | -2.57602600 |
| H   | 0.37509300  | 0.54305800  | -2.68029900 |
| H   | 1.92612500  | 0.12277600  | -2.38468900 |
| H   | -0.67898000 | 2.28723800  | -0.12850000 |
| H   | 0.71398500  | 2.65387100  | 0.65844200  |
| H   | 0.71394600  | 2.54851100  | -0.96340500 |
| H   | -0.38991100 | -0.60655600 | 2.47985200  |
| H   | 1.17607700  | -0.22359600 | 2.71230800  |
| H   | 0.06908600  | 0.95361900  | 2.51870500  |
| H   | -0.14039300 | -2.62676800 | -0.01178400 |
| H   | 1.38033000  | -2.66813300 | -0.60193400 |
| H   | 1.13362300  | -2.59422700 | 1.00559200  |
| O   | 2.78883000  | 0.19696900  | 0.12780800  |
| H   | 3.09134200  | 0.95491000  | 0.66079000  |
| H   | 3.25856500  | -0.57871600 | 0.48541100  |
| N   | -2.79456100 | -1.02429000 | -0.15681300 |
| O   | -3.88125400 | -1.57561700 | -0.09546500 |
| H   | -2.93949600 | 0.02071500  | -0.12779500 |
| O   | -2.69733000 | 2.08585000  | -0.04221700 |
| H   | -3.07049800 | 2.46273900  | 0.77288200  |
| H   | -3.16293500 | 2.54192600  | -0.76397700 |

2 Lower vibrational modes in 18.4103 cm<sup>-1</sup> and 33.9983 cm<sup>-1</sup>.  
Free Energy = -4952.113304 Hartree

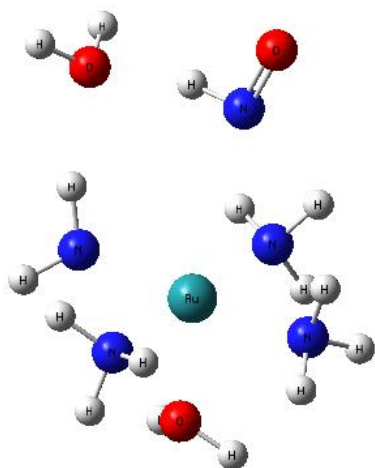

***trans*<sup>-1</sup>[Ru(NH<sub>3</sub>)<sub>4</sub>(H<sub>2</sub>O)HNO]<sup>2+</sup> + H<sub>2</sub>O  
TSII**

| 2 1 |             |             |             |
|-----|-------------|-------------|-------------|
| Ru  | 0.59890200  | -0.06722500 | 0.01539500  |
| N   | 0.50216000  | 0.16309900  | -2.14960500 |
| N   | 1.49946300  | 1.90873100  | 0.17801700  |
| N   | 0.72560200  | -0.32261800 | 2.19249000  |
| N   | -0.38171700 | -2.02490200 | -0.15885300 |
| H   | -0.29425600 | -0.30972200 | -2.58238600 |
| H   | 0.45037600  | 1.13220200  | -2.47124500 |
| H   | 1.33749400  | -0.23333800 | -2.58741500 |
| H   | 0.72580000  | 2.57854200  | 0.21797200  |
| H   | 2.06953500  | 2.07202100  | 1.01080800  |
| H   | 2.08467500  | 2.18652000  | -0.61286500 |
| H   | -0.09448500 | -0.79037400 | 2.58507000  |
| H   | 1.52846500  | -0.88301800 | 2.48751500  |
| H   | 0.80346900  | 0.55884900  | 2.70471800  |
| H   | -1.39999000 | -1.89466700 | -0.12948600 |
| H   | -0.18299700 | -2.51990600 | -1.03117000 |
| H   | -0.15645600 | -2.68538900 | 0.58834300  |
| O   | 2.51780200  | -0.98245000 | -0.32331600 |
| H   | 3.26718700  | -0.52510800 | 0.10055600  |
| H   | 2.58755900  | -1.91457200 | -0.04682600 |
| N   | -3.16856700 | -0.47963700 | -0.01585400 |
| O   | -4.38454100 | -0.46358200 | 0.05870900  |
| H   | -2.80360100 | 0.51049500  | 0.00184800  |
| O   | -1.50192300 | 2.14917700  | 0.08718700  |
| H   | -1.81712700 | 2.64335800  | 0.86349200  |
| H   | -1.74661100 | 2.69412200  | -0.68029100 |

2 Lower vibrational modes in 28.4909 cm<sup>-1</sup> and 40.9733 cm<sup>-1</sup>.  
1 Imaginary frequency in -124.8577 cm<sup>-1</sup>.  
Free Energy = -4952.109254 Hartree

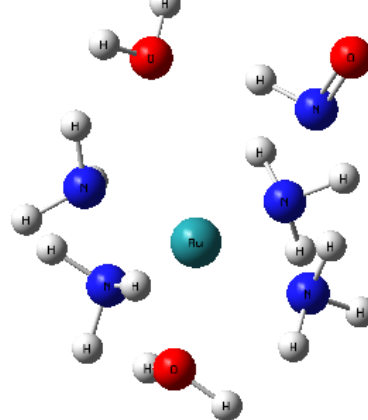

***trans*<sup>-1</sup>[Ru(NH<sub>3</sub>)<sub>4</sub>(H<sub>2</sub>O)HNO]<sup>2+</sup> + H<sub>2</sub>O**  
**PC**

2 1

|    |             |             |             |
|----|-------------|-------------|-------------|
| Ru | 0.65755700  | 0.00227400  | 0.00195400  |
| N  | 0.61697100  | -1.46743700 | -1.61688800 |
| N  | 2.19173900  | 1.15009700  | -1.07342500 |
| N  | 0.73430500  | 1.43095500  | 1.66803100  |
| N  | -0.88245600 | -1.13816900 | 1.05102700  |
| H  | -0.28793100 | -1.92476200 | -1.75011500 |
| H  | 0.87724000  | -1.10689000 | -2.53777400 |
| H  | 1.28210400  | -2.21864400 | -1.41651000 |
| H  | 1.79773400  | 1.79756200  | -1.75997400 |
| H  | 2.78214600  | 1.72500500  | -0.46809900 |
| H  | 2.84045900  | 0.55998400  | -1.59935600 |
| H  | -0.16467500 | 1.55932600  | 2.13851500  |
| H  | 1.38415500  | 1.13645000  | 2.40073400  |
| H  | 1.03520600  | 2.37160500  | 1.40269900  |
| H  | -1.82430300 | -0.82417900 | 0.78578300  |
| H  | -0.85789600 | -2.14259800 | 0.86040600  |
| H  | -0.84043900 | -1.05865200 | 2.06976100  |
| O  | 2.23111200  | -1.25874300 | 0.89038100  |
| H  | 3.08404400  | -0.82000700 | 1.05876500  |
| H  | 1.99716600  | -1.69884900 | 1.72723100  |
| N  | -3.71567200 | 0.09190000  | 0.08293700  |
| O  | -4.89775000 | -0.16104200 | -0.03477500 |
| H  | -3.50122900 | 0.99941900  | -0.41107100 |
| O  | -0.97900400 | 1.15888700  | -0.93841700 |
| H  | -0.93667500 | 2.12284600  | -0.80358200 |
| H  | -1.04867300 | 1.03808700  | -1.90269400 |

2 Lower vibrational modes in 40.8806 cm<sup>-1</sup> and 61.8242 cm<sup>-1</sup>.  
 Free Energy = -4952.123755 Hartree

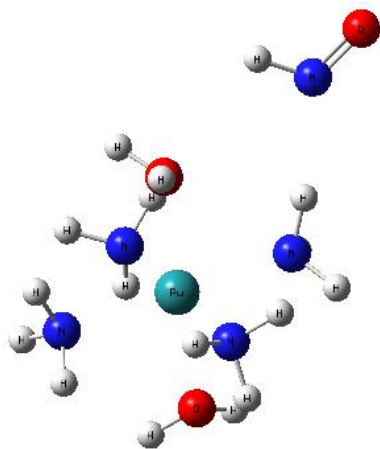

Supplement: c5dt03706a1.pdf [file c5dt03706a1.pdf]
